# Supplementary material for: Cross-over from pyrene to acene optical and electronic properties: a theoretical investigation of a series of pyrene derivatives fused with N-, S, and O-containing heterocycles
Source: Royal Society of Chemistry journal article supplement (doi:10.1039/d4cp01625d), 2024-01-01
Supplement: d4cp01625d1.pdf [file d4cp01625d1.pdf]

## Supporting Information

Cross-over from pyrene to acene optical and electronic properties, a theoretical investigation of a series of pyrene derivatives fused with N-, S, and O-containing heterocycles

Hachem Araji,<sup>a</sup> Maria Nakhoul,<sup>b</sup> Elio Challita,<sup>c</sup> Nour Barmo,<sup>d</sup> and Brigitte Wex<sup>\*e</sup>

<sup>a</sup> Department of Internal Medicine, Staten Island University Hospital/Northwell Health, Staten Island, New York, USA

<sup>b</sup> Dana-Farber Cancer Institute, Department of Informatics and Analytics, Boston MA, USA

<sup>c</sup> Wyss Institute for Biologically Inspired Engineering; School of Engineering and Applied Sciences; Harvard University, Boston, MA, USA

<sup>d</sup> Department of Emergency Medicine, American University of Beirut Medical Center, Beirut, Lebanon

<sup>\*e</sup> Lebanese American University, Department of Natural Sciences, Byblos, Lebanon

## Table of Contents

|                                                                                                                                                                                                                                                                                                                               |    |
|-------------------------------------------------------------------------------------------------------------------------------------------------------------------------------------------------------------------------------------------------------------------------------------------------------------------------------|----|
| <b>Figure S1.</b> Cyclic voltammogram of <b>2</b> in tetra- <sup>n</sup> butylammonium hexafluorophosphate (0.1 M) in dichloromethane containing ferrocene (Fc/Fc <sup>+</sup> ).....                                                                                                                                         | 29 |
| <b>Table S1.</b> Value of $\Omega$ to predict ordering of states in TD-DFT computations in pyrene.....                                                                                                                                                                                                                        | 4  |
| <b>Table S2.</b> Optimized geometries of <b>1a-d</b> as assessed at the tuned $\omega$ B97X-D/cc-pvtz level of theory in the ground state. ....                                                                                                                                                                               | 4  |
| <b>Table S3.</b> Optimized geometries of <b>1e</b> , <b>PY</b> , <b>2</b> , and <b>TC</b> as assessed at the tuned $\omega$ B97X-D/cc-pvtz level of theory in the ground state. ....                                                                                                                                          | 4  |
| <b>Table S4.</b> Gas Phase Vertical transition energies, wavelengths, oscillator strength, transition dipole moments, electronic configurations and populations of <b>1a</b> as computed using time-dependent DFT (TD-DFT) at the $\omega$ B97X-D/cc-pVTC level of theory.....                                                | 5  |
| <b>Table S5.</b> Gas Phase Vertical transition energies, wavelengths, oscillator strength, transition dipole moments, electronic configurations and populations of <b>1b</b> as computed using time-dependent DFT (TD-DFT) at the $\omega$ B97X-D/cc-pVTC level of theory.....                                                | 6  |
| <b>Table S6.</b> Gas Phase Vertical transition energies, wavelengths, oscillator strength, transition dipole moments, electronic configurations and populations of <b>1c</b> as computed using time-dependent DFT (TD-DFT) at the $\omega$ B97X-D/cc-pVTC level of theory.....                                                | 7  |
| <b>Table S7.</b> Gas Phase Vertical transition energies, wavelengths, oscillator strength, transition dipole moments, electronic configurations and populations of <b>1d</b> and <b>1e</b> as computed using time-dependent DFT (TD-DFT) at the $\omega$ B97X-D/cc-pVTC level of theory. ....                                 | 8  |
| <b>Table S8.</b> Gas Phase Vertical transition energies, wavelengths, oscillator strength, transition dipole moments, electronic configurations and populations of <b>PY</b> , <b>2</b> , and <b>TC</b> as computed using time-dependent DFT (TD-DFT) at the $\omega$ B97X-D/cc-pVTC level of theory.....                     | 9  |
| <b>Table S 9.</b> Pairs of Natural Transition orbitals (isovalue surface 0.02 a.u.) for $S_0 \rightarrow S_1$ and $S_0 \rightarrow S_2$ transitions at the $\omega$ B97X-D <sup>3</sup> /cc-pVTZ <sup>4</sup> level of theory for <b>1a-c</b> .....                                                                           | 10 |
| <b>Table S 10.</b> Pairs of Natural Transition orbitals (isovalue surface 0.02 a.u.) for $S_0 \rightarrow S_1$ and $S_0 \rightarrow S_2$ transitions at the $\omega$ B97X-D <sup>3</sup> /cc-pVTZ <sup>4</sup> level of theory for <b>1d</b> , <b>1e</b> , and <b>PY</b> .....                                                | 11 |
| <b>Table S 11.</b> Pairs of Natural Transition orbitals (isovalue surface 0.02 a.u.) for $S_0 \rightarrow S_1$ and $S_0 \rightarrow S_2$ transitions at the $\omega$ B97X-D <sup>3</sup> /cc-pVTZ <sup>4</sup> level of theory for <b>2</b> and <b>TC</b> .....                                                               | 12 |
| <b>Table S12.</b> Frequency, $\omega$ (cm <sup>-1</sup> ), Huang-Rhys factors, <i>S</i> , and relaxation energies, $\lambda_{rel}$ (meV), for the totally symmetric vibrations of <b>1a</b> in its neutral and anionic state as computed at $\omega$ -tuned $\omega$ B97X-D/cc-pVTZ level of theory. Values are unscaled..... | 13 |
| <b>Table S13.</b> Frequency, $\omega$ (cm <sup>-1</sup> ), Huang-Rhys factors, <i>S</i> , and relaxation energies, $\lambda_{rel}$ (meV), for the totally symmetric vibrations of <b>1b</b> in its neutral and anionic state as computed at $\omega$ -tuned $\omega$ B97X-D/cc-pVTZ level of theory. Values are unscaled..... | 14 |
| <b>Table S14.</b> Frequency, $\omega$ (cm <sup>-1</sup> ), Huang-Rhys factors, <i>S</i> , and relaxation energies, $\lambda_{rel}$ (meV), for the totally symmetric vibrations of <b>1c</b> in its neutral and anionic state as computed at $\omega$ -tuned $\omega$ B97X-D/cc-pVTZ level of theory. Values are unscaled..... | 15 |
| <b>Table S15.</b> Frequency, $\omega$ (cm <sup>-1</sup> ), Huang-Rhys factors, <i>S</i> , and relaxation energies, $\lambda_{rel}$ (meV), for the totally symmetric vibrations of <b>1d</b> in its neutral and anionic state as computed at $\omega$ -tuned $\omega$ B97X-D/cc-pVTZ level of theory. Values are unscaled..... | 16 |

|                                                                                                                                                                                                                                                                                                                                         |    |
|-----------------------------------------------------------------------------------------------------------------------------------------------------------------------------------------------------------------------------------------------------------------------------------------------------------------------------------------|----|
| <b>Table S16.</b> Frequency, $\omega$ ( $\text{cm}^{-1}$ ), Huang-Rhys factors, $S$ , and relaxation energies, $\lambda_{\text{rel}}$ (meV), for the totally symmetric vibrations of <b>1e</b> in its neutral and anionic state as computed at $\omega$ -tuned $\omega\text{B97X-D/cc-pVTZ}$ level of theory. Values are unscaled.....  | 17 |
| <b>Table S17.</b> Frequency, $\omega$ ( $\text{cm}^{-1}$ ), Huang-Rhys factors, $S$ , and relaxation energies, $\lambda_{\text{rel}}$ (meV), for the totally symmetric vibrations of <b>PY</b> in its neutral and anionic state as computed at $\omega$ -tuned $\omega\text{B97X-D/cc-pVTZ}$ level of theory. Values are unscaled.....  | 18 |
| <b>Table S18.</b> Frequency, $\omega$ ( $\text{cm}^{-1}$ ), Huang-Rhys factors, $S$ , and relaxation energies, $\lambda_{\text{rel}}$ (meV), for the totally symmetric vibrations of <b>2</b> in its neutral and anionic state as computed at $\omega$ -tuned $\omega\text{B97X-D/cc-pVTZ}$ level of theory. Values are unscaled. ....  | 19 |
| <b>Table S19.</b> Frequency, $\omega$ ( $\text{cm}^{-1}$ ), Huang-Rhys factors, $S$ , and relaxation energies, $\lambda_{\text{rel}}$ (meV), for the totally symmetric vibrations of <b>TC</b> in its neutral and anionic state as computed at $\omega$ -tuned $\omega\text{B97X-D/cc-pVTZ}$ level of theory. Values are unscaled.....  | 20 |
| <b>Table S20.</b> Frequency, $\omega$ ( $\text{cm}^{-1}$ ), Huang-Rhys factors, $S$ , and relaxation energies, $\lambda_{\text{rel}}$ (meV), for the totally symmetric vibrations of <b>1a</b> in its neutral and cationic state as computed at $\omega$ -tuned $\omega\text{B97X-D/cc-pVTZ}$ level of theory. Values are unscaled..... | 21 |
| <b>Table S21.</b> Frequency, $\omega$ ( $\text{cm}^{-1}$ ), Huang-Rhys factors, $S$ , and relaxation energies, $\lambda_{\text{rel}}$ (meV), for the totally symmetric vibrations of <b>1b</b> in its neutral and cationic state as computed at $\omega$ -tuned $\omega\text{B97X-D/cc-pVTZ}$ level of theory. Values are unscaled..... | 22 |
| <b>Table S22.</b> Frequency, $\omega$ ( $\text{cm}^{-1}$ ), Huang-Rhys factors, $S$ , and relaxation energies, $\lambda_{\text{rel}}$ (meV), for the totally symmetric vibrations of <b>1c</b> in its neutral and cationic state as computed at $\omega$ -tuned $\omega\text{B97X-D/cc-pVTZ}$ level of theory. Values are unscaled..... | 23 |
| <b>Table S23.</b> Frequency, $\omega$ ( $\text{cm}^{-1}$ ), Huang-Rhys factors, $S$ , and relaxation energies, $\lambda_{\text{rel}}$ (meV), for the totally symmetric vibrations of <b>1d</b> in its neutral and cationic state as computed at $\omega$ -tuned $\omega\text{B97X-D/cc-pVTZ}$ level of theory. Values are unscaled..... | 24 |
| <b>Table S24.</b> Frequency, $\omega$ ( $\text{cm}^{-1}$ ), Huang-Rhys factors, $S$ , and relaxation energies, $\lambda_{\text{rel}}$ (meV), for the totally symmetric vibrations of <b>1e</b> in its neutral and cationic state as computed at $\omega$ -tuned $\omega\text{B97X-D/cc-pVTZ}$ level of theory. Values are unscaled..... | 25 |
| <b>Table S25.</b> Frequency, $\omega$ ( $\text{cm}^{-1}$ ), Huang-Rhys factors, $S$ , and relaxation energies, $\lambda_{\text{rel}}$ (meV), for the totally symmetric vibrations of <b>PY</b> in its neutral and cationic state as computed at $\omega$ -tuned $\omega\text{B97X-D/cc-pVTZ}$ level of theory. Values are unscaled..... | 26 |
| <b>Table S26.</b> Frequency, $\omega$ ( $\text{cm}^{-1}$ ), Huang-Rhys factors, $S$ , and relaxation energies, $\lambda_{\text{rel}}$ (meV), for the totally symmetric vibrations of <b>2</b> in its neutral and cationic state as computed at $\omega$ -tuned $\omega\text{B97X-D/cc-pVTZ}$ level of theory. Values are unscaled.....  | 27 |
| <b>Table S27.</b> Frequency, $\omega$ ( $\text{cm}^{-1}$ ), Huang-Rhys factors, $S$ , and relaxation energies, $\lambda_{\text{rel}}$ (meV), for the totally symmetric vibrations of <b>TC</b> in its neutral and cationic state as computed at $\omega$ -tuned $\omega\text{B97X-D/cc-pVTZ}$ level of theory. Values are unscaled..... | 28 |

**Table S1.** Value of  $\Omega$  to predict ordering of states in TD-DFT computations in pyrene.

$$\Omega = \frac{4(a+c+d)/12}{(4b+e+2f)/7} (1)^1$$

|                                                                                     | a       | b      | c       | d       | e       | f       |
|-------------------------------------------------------------------------------------|---------|--------|---------|---------|---------|---------|
| Pyrene, DFT-optimized at tuned $\omega$ B97X-D/cc-pvtz level of theory (this study) |         |        |         |         |         |         |
| <b>Length (Å)</b>                                                                   | 1.37981 | 1.3875 | 1.40731 | 1.43628 | 1.42274 | 1.33894 |
| Calculated according to equation 1: $\Omega=1.0211$                                 |         |        |         |         |         |         |
| Pyrene <sup>2</sup>                                                                 |         |        |         |         |         |         |
| <b>Length (Å)</b>                                                                   | 1.386   | 1.400  | 1.422   | 1.436   | 1.428   | 1.344   |
| Calculated according to equation 1: $\Omega=1.019212$                               |         |        |         |         |         |         |

a,c,d= transversal bonds to central bond e; b,f= parallel bonds to central bond e.

**Table S2.** Optimized geometries of **1a-d** as assessed at the tuned  $\omega$ B97X-D/cc-pvtz level of theory in the ground state.

|                                                                  | <b>1a</b> | <b>1b</b> | <b>1c</b> | <b>1d</b> |
|------------------------------------------------------------------|-----------|-----------|-----------|-----------|
| <b>O<br/>pti<br/>mi<br/>ze<br/>d<br/>Ge<br/>o<br/>me<br/>try</b> |           |           |           |           |

**Table S3.** Optimized geometries of **1e**, **PY**, **2**, and **TC** as assessed at the tuned  $\omega$ B97X-D/cc-pvtz level of theory in the ground state.

|                                                                  | <b>1e</b> | <b>PY</b> | <b>2</b> | <b>TC</b> |
|------------------------------------------------------------------|-----------|-----------|----------|-----------|
| <b>O<br/>pti<br/>mi<br/>ze<br/>d<br/>Ge<br/>o<br/>me<br/>try</b> |           |           |          |           |

**Table S4.** Gas Phase Vertical transition energies, wavelengths, oscillator strength, transition dipole moments, electronic configurations and populations of **1a** as computed using time-dependent DFT (TD-DFT) at the  $\omega$ B97X-D/cc-pVTG level of theory.

|                          | Transition            | $E_{\text{vert}}$ | $\lambda_{\text{vert}}$ | f      | $\mu_{\text{ge}}$ | Electronic config. |      |      | %CB |
|--------------------------|-----------------------|-------------------|-------------------------|--------|-------------------|--------------------|------|------|-----|
|                          |                       |                   |                         |        |                   |                    | →    |      |     |
| <b>1a</b>                | $S_0 \rightarrow S_1$ | 3.81              | 326                     | 0.1531 | 1.6419            | H-1                | →    | LUMO | 25  |
|                          |                       |                   |                         |        |                   | HOMO               | →    | LUMO | 52  |
|                          |                       |                   |                         |        |                   | HOMO               | →    | L+1  | 14  |
|                          | $S_0 \rightarrow S_2$ | 3.86              | 321                     | 0.1168 | 1.235             | H-1                | →    | LUMO | 32  |
|                          |                       |                   |                         |        |                   | HOMO               | →    | LUMO | 36  |
|                          |                       |                   |                         |        |                   | HOMO               | →    | L+1  | 24  |
|                          | $S_0 \rightarrow S_3$ | 4.43              | 280                     | 0.0019 | 0.0176            | H-3                | →    | LUMO | 20  |
|                          |                       |                   |                         |        |                   | H-2                | →    | LUMO | 16  |
|                          |                       |                   |                         |        |                   | HOMO               | →    | L+2  | 54  |
|                          | $S_0 \rightarrow S_4$ | 4.63              | 268                     | 0.5497 | 4.8487            | H-1                | →    | LUMO | 33  |
|                          |                       |                   |                         |        |                   | HOMO               | →    | L+1  | 50  |
|                          | $S_0 \rightarrow S_5$ | 4.65              | 267                     | 0.074  | 0.6493            | H-2                | →    | LUMO | 41  |
|                          |                       |                   |                         |        |                   | H-1                | →    | L+2  | 11  |
|                          |                       |                   |                         |        |                   | HOMO               | →    | L+2  | 28  |
|                          | $S_0 \rightarrow S_6$ | 4.81              | 258                     | 0.0014 | 0.012             | H-3                | →    | LUMO | 67  |
|                          |                       |                   |                         |        |                   | H-2                | →    | LUMO | 15  |
| $S_0 \rightarrow S_7$    | 5.06                  | 245               | 0.8306                  | 6.7032 | H-1               | →                  | L+1  | 76   |     |
|                          |                       |                   |                         |        | H-2               | →                  | L+1  | 18   |     |
| $S_0 \rightarrow S_8$    | 5.09                  | 244               | 0.167                   | 1.3398 | H-1               | →                  | L+2  | 43   |     |
|                          |                       |                   |                         |        | H-3               | →                  | L+1  | 20   |     |
| $S_0 \rightarrow S_9$    | 5.20                  | 239               | 0.0028                  | 0.0221 | H-1               | →                  | L+2  | 10   |     |
|                          |                       |                   |                         |        | HOMO              | →                  | L+3  | 48   |     |
|                          |                       |                   |                         |        | H-4               | →                  | LUMO | 38   |     |
| $S_0 \rightarrow S_{10}$ | 5.29                  | 234               | 0.0111                  | 0.0854 | H-3               | →                  | L+2  | 17   |     |
|                          |                       |                   |                         |        | H-2               | →                  | L+2  | 14   |     |
|                          |                       |                   |                         |        | HOMO              | →                  | L+4  | 14   |     |
|                          |                       |                   |                         |        |                   |                    |      |      |     |

$E_{\text{vert}}$  = gas phase vertical transition energy (e.V.);  $\lambda_{\text{vert}}$  = wavelength of vertical transition (nm); f = oscillator strength;  $\mu_{\text{ge}}$  = transition dipole moment (Debye); %CB = percent of major contributions ( $\geq 10\%$ ); H = HOMO; L = LUMO.

**Table S5.** Gas Phase Vertical transition energies, wavelengths, oscillator strength, transition dipole moments, electronic configurations and populations of **1b** as computed using time-dependent DFT (TD-DFT) at the  $\omega$ B97X-D/cc-pVTC level of theory.

|                          | Transition            | $E_{\text{vert}}$ | $\lambda_{\text{vert}}$ | f      | $\mu_{\text{ge}}$ | Electronic config. |     |      | %CB |
|--------------------------|-----------------------|-------------------|-------------------------|--------|-------------------|--------------------|-----|------|-----|
| <b>1b</b>                | $S_0 \rightarrow S_1$ | 3.88              | 320                     | 0.004  | 0.0422            | H-1                | →   | LUMO | 40  |
|                          |                       |                   |                         |        |                   | HOMO               | →   | L+1  | 57  |
|                          | $S_0 \rightarrow S_2$ | 3.90              | 318                     | 0.2925 | 3.0639            | H-1                | →   | L+1  | 10  |
|                          |                       |                   |                         |        |                   | HOMO               | →   | LUMO | 88  |
|                          | $S_0 \rightarrow S_3$ | 4.54              | 273                     | 0.0004 | 0.0039            | H-2                | →   | LUMO | 79  |
|                          |                       |                   |                         |        |                   | HOMO               | →   | L+2  | 10  |
|                          | $S_0 \rightarrow S_4$ | 4.75              | 261                     | 0.4732 | 4.0643            | H-1                | →   | LUMO | 53  |
|                          |                       |                   |                         |        |                   | HOMO               | →   | L+1  | 38  |
|                          | $S_0 \rightarrow S_5$ | 4.80              | 259                     | 0.0381 | 0.3239            | HOMO               | →   | L+2  | 68  |
|                          | $S_0 \rightarrow S_6$ | 5.19              | 239                     | 0.1469 | 1.1543            | H-2                | →   | L+1  | 53  |
|                          |                       |                   |                         |        |                   | H-1                | →   | L+2  | 20  |
|                          | $S_0 \rightarrow S_7$ | 5.20              | 238                     | 1.1709 | 9.1828            | H-1                | →   | L+1  | 73  |
|                          | $S_0 \rightarrow S_8$ | 5.25              | 236                     | 0.033  | 0.2564            | H-3                | →   | LUMO | 19  |
|                          |                       |                   |                         |        |                   | H-3                | →   | L+1  | 11  |
|                          |                       |                   |                         |        |                   | HOMO               | →   | L+3  | 43  |
|                          | $S_0 \rightarrow S_9$ | 5.52              | 225                     | 0.0007 | 0.0049            | H-3                | →   | LUMO | 66  |
| HOMO                     |                       |                   |                         |        |                   | →                  | L+3 | 16   |     |
| $S_0 \rightarrow S_{10}$ | 5.64                  | 220               | 0.022                   | 0.159  | H-2               | →                  | L+2 | 18   |     |
|                          |                       |                   |                         |        | H-1               | →                  | L+2 | 45   |     |
|                          |                       |                   |                         |        | HOMO              | →                  | L+3 | 19   |     |

$E_{\text{vert}}$  = gas phase vertical transition energy (e.V.);  $\lambda_{\text{vert}}$  = wavelength of vertical transition (nm); f = oscillator strength;  $\mu_{\text{ge}}$  = transition dipole moment (Debye); %CB = percent of major contributions ( $\geq 10\%$ ); H = HOMO; L = LUMO.

**Table S6.** Gas Phase Vertical transition energies, wavelengths, oscillator strength, transition dipole moments, electronic configurations and populations of **1c** as computed using time-dependent DFT (TD-DFT) at the  $\omega$ B97X-D/cc-pVTG level of theory.

|                          | Transition            | $E_{\text{vert}}$ | $\lambda_{\text{vert}}$ | f      | $\mu_{\text{ge}}$ | Electronic config. |      |      | %CB |
|--------------------------|-----------------------|-------------------|-------------------------|--------|-------------------|--------------------|------|------|-----|
|                          |                       |                   |                         |        |                   |                    | →    |      |     |
| <b>1c</b>                | $S_0 \rightarrow S_1$ | 4.04              | 307                     | 0.0055 | 0.0557            | H-1                | →    | LUMO | 38  |
|                          |                       |                   |                         |        |                   | HOMO               | →    | L+1  | 56  |
|                          | $S_0 \rightarrow S_2$ | 4.13              | 300                     | 0.2547 | 2.5188            | H-1                | →    | L+1  | 14  |
|                          |                       |                   |                         |        |                   | HOMO               | →    | LUMO | 81  |
|                          | $S_0 \rightarrow S_3$ | 4.76              | 260                     | 0.0011 | 0.0091            | H-3                | →    | LUMO | 10  |
|                          |                       |                   |                         |        |                   | H-2                | →    | LUMO | 70  |
|                          | $S_0 \rightarrow S_4$ | 5.01              | 247                     | 0.7008 | 5.7078            | H-1                | →    | LUMO | 57  |
|                          |                       |                   |                         |        |                   | HOMO               | →    | L+1  | 39  |
|                          | $S_0 \rightarrow S_5$ | 5.16              | 240                     | 0.0086 | 0.0679            | H-2                | →    | L+1  | 17  |
|                          |                       |                   |                         |        |                   | H-1                | →    | L+2  | 11  |
|                          |                       |                   |                         |        |                   | HOMO               | →    | L+2  | 43  |
|                          |                       |                   |                         |        |                   | HOMO               | →    | L+5  | 11  |
|                          | $S_0 \rightarrow S_6$ | 5.28              | 235                     | 1.426  | 11.017            | H-1                | →    | L+1  | 79  |
|                          |                       |                   |                         |        |                   | HOMO               | →    | LUMO | 15  |
|                          | $S_0 \rightarrow S_7$ | 5.36              | 231                     | 0.002  | 0.0149            | H-3                | →    | L+1  | 26  |
|                          |                       |                   |                         |        |                   | HOMO               | →    | L+2  | 27  |
|                          |                       |                   |                         |        |                   | HOMO               | →    | L+5  | 29  |
|                          | $S_0 \rightarrow S_8$ | 5.42              | 229                     | 0.0049 | 0.0372            | H-3                | →    | LUMO | 59  |
|                          |                       |                   |                         |        |                   | H-2                | →    | L+1  | 19  |
|                          | $S_0 \rightarrow S_9$ | 5.63              | 220                     | 0.0039 | 0.0286            | H-3                | →    | LUMO | 14  |
| H-2                      |                       |                   |                         |        |                   | →                  | LUMO | 14   |     |
| H-2                      |                       |                   |                         |        |                   | →                  | L+1  | 37   |     |
| HOMO                     |                       |                   |                         |        |                   | →                  | L+2  | 13   |     |
| $S_0 \rightarrow S_{10}$ | 5.94                  | 209               | 0.0243                  | 0.1674 | H-2               | →                  | L+1  | 10   |     |
|                          |                       |                   |                         |        | H-1               | →                  | L+2  | 55   |     |
|                          |                       |                   |                         |        | HOMO              | →                  | L+5  | 17   |     |

$E_{\text{vert}}$  = gas phase vertical transition energy (e.V.);  $\lambda_{\text{vert}}$  = wavelength of vertical transition (nm); f = oscillator strength;  $\mu_{\text{ge}}$  = transition dipole moment (Debye); %CB = percent of major contributions ( $\geq 10\%$ ); H = HOMO; L = LUMO.

**Table S7.** Gas Phase Vertical transition energies, wavelengths, oscillator strength, transition dipole moments, electronic configurations and populations of **1d** and **1e** as computed using time-dependent DFT (TD-DFT) at the  $\omega$ B97X-D/cc-pVTC level of theory.

| CP        | Transition            | $E_{\text{vert}}$ | $\lambda_{\text{vert}}$ | f      | $\mu_{\text{ge}}$ | Electronic config. |                    | %CB |
|-----------|-----------------------|-------------------|-------------------------|--------|-------------------|--------------------|--------------------|-----|
| <b>1d</b> | $S_0 \rightarrow S_1$ | 3.84              | 323                     | 0.2527 | 2.6877            | HOMO               | $\rightarrow$ LUMO | 85  |
|           | $S_0 \rightarrow S_2$ | 3.87              | 320                     | 0.0132 | 0.1393            | H-1                | $\rightarrow$ LUMO | 52  |
|           |                       |                   |                         |        |                   | HOMO               | $\rightarrow$ L+2  | 39  |
|           | $S_0 \rightarrow S_4$ | 4.69              | 264                     | 0.5884 | 5.1214            | H-1                | $\rightarrow$ LUMO | 42  |
|           |                       |                   |                         |        |                   | HOMO               | $\rightarrow$ L+2  | 56  |
|           | $S_0 \rightarrow S_7$ | 5.13              | 242                     | 0.7506 | 5.9766            | H-1                | $\rightarrow$ L+2  | 61  |
|           |                       |                   |                         |        |                   | HOMO               | $\rightarrow$ L+3  | 21  |
|           | $S_0 \rightarrow S_9$ | 5.29              | 234                     | 0.5107 | 3.9382            | H-2                | $\rightarrow$ L+1  | 26  |
|           |                       |                   |                         |        |                   | H-1                | $\rightarrow$ L+2  | 25  |
| HOMO      |                       |                   |                         |        |                   | $\rightarrow$ L+3  | 39                 |     |
| <b>1e</b> | $S_0 \rightarrow S_1$ | 3.93              | 315                     | 0.0124 | 0.1291            | H-1                | $\rightarrow$ LUMO | 59  |
|           |                       |                   |                         |        |                   | HOMO               | $\rightarrow$ L+2  | 36  |
|           | $S_0 \rightarrow S_2$ | 4.10              | 302                     | 0.0993 | 0.9888            | H-1                | $\rightarrow$ L+2  | 21  |
|           |                       |                   |                         |        |                   | HOMO               | $\rightarrow$ LUMO | 73  |
|           | $S_0 \rightarrow S_5$ | 4.77              | 260                     | 0.9181 | 7.854             | H-1                | $\rightarrow$ LUMO | 37  |
|           |                       |                   |                         |        |                   | HOMO               | $\rightarrow$ L+2  | 58  |
|           | $S_0 \rightarrow S_8$ | 4.95              | 250                     | 0.6485 | 5.3428            | H-3                | $\rightarrow$ L+1  | 11  |
|           |                       |                   |                         |        |                   | H-1                | $\rightarrow$ L+2  | 42  |
|           |                       |                   |                         |        |                   | HOMO               | $\rightarrow$ LUMO | 14  |
|           |                       |                   |                         |        |                   | HOMO               | $\rightarrow$ L+4  | 14  |
|           | $S_0 \rightarrow S_9$ | 4.97              | 250                     | 0.4958 | 4.0738            | H-3                | $\rightarrow$ L+1  | 16  |
| H-2       |                       |                   |                         |        |                   | $\rightarrow$ L+3  | 10                 |     |
| H-1       |                       |                   |                         |        |                   | $\rightarrow$ L+2  | 28                 |     |
| HOMO      |                       |                   |                         |        |                   | $\rightarrow$ LUMO | 10                 |     |
| HOMO      |                       |                   |                         |        |                   | $\rightarrow$ L+4  | 20                 |     |

$E_{\text{vert}}$  = gas phase vertical transition energy (e.V.);  $\lambda_{\text{vert}}$  = wavelength of vertical transition (nm); f = oscillator strength;  $\mu_{\text{ge}}$  = transition dipole moment (Debye); %CB = percent of major contributions ( $\geq 10\%$ ); H = HOMO; L = LUMO.



**Table S8.** Gas Phase Vertical transition energies, wavelengths, oscillator strength, transition dipole moments, electronic configurations and populations of **PY**, **2**, and **TC** as computed using time-dependent DFT (TD-DFT) at the  $\omega$ B97X-D/cc-pVTC level of theory.

| CP                    | Transition            | $E_{\text{vert}}$     | $\lambda_{\text{vert}}$ | f      | $\mu_{\text{ge}}$ | Electronic config. |      | %CB  |      |    |
|-----------------------|-----------------------|-----------------------|-------------------------|--------|-------------------|--------------------|------|------|------|----|
| PY                    | $S_0 \rightarrow S_1$ | 4.24                  | 293                     | 0.0003 | 0.0031            | H-1                | →    | LUMO | 44   |    |
|                       |                       |                       |                         |        |                   | HOMO               | →    | L+1  | 53   |    |
|                       | $S_0 \rightarrow S_2$ | 4.32                  | 287                     | 0.3247 | 3.0654            | H-1                | →    | L+1  | 13   |    |
|                       |                       |                       |                         |        |                   | HOMO               | →    | LUMO | 87   |    |
|                       | $S_0 \rightarrow S_4$ | 5.52                  | 225                     | 0.5279 | 3.9024            | H-1                | →    | LUMO | 54   |    |
|                       |                       |                       |                         |        |                   | HOMO               | →    | L+1  | 46   |    |
|                       | $S_0 \rightarrow S_6$ | 5.96                  | 208                     | 1.209  | 8.2819            | H-1                | →    | L+1  | 80   |    |
|                       |                       |                       |                         |        |                   | HOMO               | →    | LUMO | 14   |    |
| 2                     | $S_0 \rightarrow S_1$ | 3.91                  | 317                     | 0.0043 | 0.0448            | H-1                | →    | LUMO | 56   |    |
|                       |                       |                       |                         |        |                   | HOMO               | →    | L+1  | 42   |    |
|                       | $S_0 \rightarrow S_2$ | 3.92                  | 316                     | 0.3776 | 3.9274            | HOMO               | →    | LUMO | 90   |    |
|                       | $S_0 \rightarrow S_4$ | 4.89                  | 253                     | 0.308  | 2.569             | H-1                | →    | LUMO | 41   |    |
|                       |                       |                       |                         |        |                   | HOMO               | →    | L+1  | 56   |    |
|                       | $S_0 \rightarrow S_7$ | 5.46                  | 227                     | 1.6238 | 12.1455           | H-1                | →    | L+1  | 86   |    |
|                       | TC                    | $S_0 \rightarrow S_1$ | 2.82                    | 440    | 0.0701            | 1.0157             | HOMO | →    | LUMO | 99 |
|                       |                       | $S_0 \rightarrow S_2$ | 3.72                    | 333    | 0.0035            | 0.0388             | H-1  | →    | LUMO | 52 |
| HOMO                  |                       |                       |                         |        |                   |                    | →    | L+1  | 45   |    |
| $S_0 \rightarrow S_5$ |                       | 4.97                  | 250                     | 2.8788 | 23.6598           | H-1                | →    | LUMO | 45   |    |
|                       |                       |                       |                         |        |                   | HOMO               | →    | L+1  | 53   |    |
| $S_0 \rightarrow S_7$ |                       | 5.40                  | 230                     | 0.0123 | 0.0927            | H-3                | →    | LUMO | 32   |    |
|                       |                       |                       |                         |        |                   | H-2                | →    | L+2  | 22   |    |
|                       |                       |                       |                         |        |                   | HOMO               | →    | L+3  | 44   |    |
| $S_0 \rightarrow S_8$ | 5.45                  | 227                   | 0.0003                  | 0.0021 | H-3               | →                  | LUMO | 53   |      |    |
|                       |                       |                       |                         |        | HOMO              | →                  | L+3  | 41   |      |    |

$E_{\text{vert}}$  = gas phase vertical transition energy (e.V.);  $\lambda_{\text{vert}}$  = wavelength of vertical transition (nm); f = oscillator strength;  $\mu_{\text{ge}}$  = transition dipole moment (Debye); %CB = percent of major contributions ( $\geq 10\%$ ); H = HOMO; L = LUMO.

**Table S 9.** Pairs of Natural Transition orbitals (isovalue surface 0.02 a.u.) for  $S_0 \rightarrow S_1$  and  $S_0 \rightarrow S_2$  transitions at the  $\omega$ B97X-D<sup>3</sup>/cc-pVTZ<sup>4</sup> level of theory for **1a-c**.

|    | $S_0 \rightarrow S_1$                                                               |                                                                                     | $S_0 \rightarrow S_2$                                                                |                                                                                       |
|----|-------------------------------------------------------------------------------------|-------------------------------------------------------------------------------------|--------------------------------------------------------------------------------------|---------------------------------------------------------------------------------------|
|    | hole                                                                                | particle                                                                            | hole                                                                                 | particle                                                                              |
| 1a | 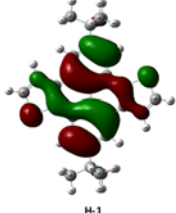   |    |    |    |
|    |    |    |    |    |
| 1b |   |   |   |   |
|    |  |  |  |  |
| 1c |  |  |  |  |
|    |  |  |  |  |

H = Highest occupied transition orbital (HOTO); L = lowest unoccupied transition orbital (LUTO).

**Table S 10.** Pairs of Natural Transition orbitals (isovalue surface 0.02 a.u.) for  $S_0 \rightarrow S_1$  and  $S_0 \rightarrow S_2$  transitions at the  $\omega$ B97X-D<sup>3</sup>/cc-pVTZ<sup>4</sup> level of theory for **1d**, **1e**, and **PY**.

|           | $S_0 \rightarrow S_1$                                                               |                                                                                     | $S_0 \rightarrow S_2$                                                                |                                                                                       |
|-----------|-------------------------------------------------------------------------------------|-------------------------------------------------------------------------------------|--------------------------------------------------------------------------------------|---------------------------------------------------------------------------------------|
|           | hole                                                                                | particle                                                                            | hole                                                                                 | particle                                                                              |
| <b>1d</b> | 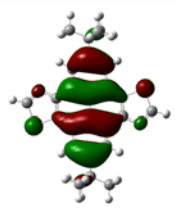   |    |    |    |
|           |    |    |    |    |
| <b>1e</b> |   |   |   |   |
|           |  |  |  |  |
| <b>PY</b> |  |  |  |  |
|           |  |  |  |  |

H = Highest occupied transition orbital (HOTO); L = lowest unoccupied transition orbital (LUTO).

**Table S 11.** Pairs of Natural Transition orbitals (isovalue surface 0.02 a.u.) for  $S_0 \rightarrow S_1$  and  $S_0 \rightarrow S_2$  transitions at the  $\omega$ B97X-D<sup>3</sup>/cc-pVTZ<sup>4</sup> level of theory for **2** and **TC**.

|    | $S_0 \rightarrow S_1$                                                                |                                                                                       | $S_0 \rightarrow S_2$                                                                |                                                                                       |
|----|--------------------------------------------------------------------------------------|---------------------------------------------------------------------------------------|--------------------------------------------------------------------------------------|---------------------------------------------------------------------------------------|
|    | hole                                                                                 | particle                                                                              | hole                                                                                 | particle                                                                              |
| 2  | 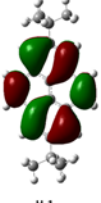    |      |    |    |
|    | H-1                                                                                  | L+1                                                                                   | H-1                                                                                  | L+1                                                                                   |
|    |     |      |    |    |
|    | H                                                                                    | L                                                                                     | H                                                                                    | L                                                                                     |
| TC |   |    |    |    |
|    | H                                                                                    | L                                                                                     | H-1                                                                                  | L+1                                                                                   |
|    |  |  |  |  |
|    | H                                                                                    | L                                                                                     | H                                                                                    | L                                                                                     |

H = Highest occupied transition orbital (HOTO); L = lowest unoccupied transition orbital (LUTO).

**Table S12.** Frequency,  $\omega$  ( $\text{cm}^{-1}$ ), Huang-Rhys factors,  $S$ , and relaxation energies,  $\lambda_{\text{rel}}$  (meV), for the totally symmetric vibrations of **1a** in its neutral and anionic state as computed at  $\omega$ -tuned  $\omega\text{B97X-D/cc-pVTZ}$  level of theory. Values are unscaled.

| 1a      |                              |        |                               |                              |        |                               |
|---------|------------------------------|--------|-------------------------------|------------------------------|--------|-------------------------------|
| Neutral |                              |        | Anion                         |                              |        |                               |
|         | $\omega$<br>$\text{cm}^{-1}$ | $S$    | $\lambda_{\text{rel}}$<br>meV | $\omega$<br>$\text{cm}^{-1}$ | $S$    | $\lambda_{\text{rel}}$<br>meV |
|         | 210                          | 0.694  | 50.6                          | 197                          | 0.003  | 0                             |
|         | 220                          | -0.004 | 0                             | 209                          | -0.692 | 50.1                          |
|         | 266                          | -0.09  | 1.1                           | 256                          | -0.003 | 0                             |
|         | 299                          | 0.233  | 8.1                           | 295                          | 0.001  | 0                             |
|         | 305                          | -0.008 | 0                             | 298                          | -0.238 | 8.5                           |
|         | 375                          | -0.105 | 2                             | 373                          | -0.124 | 2.8                           |
|         | 394                          | -0.315 | 19.6                          | 393                          | -0.309 | 18.7                          |
|         | 493                          | -0.213 | 11.1                          | 489                          | -0.036 | 0.3                           |
|         | 494                          | 0.114  | 3.2                           | 492                          | 0.237  | 13.8                          |
|         | 620                          | -0.2   | 12.4                          | 602                          | -0.001 | 0                             |
|         | 623                          | 0.003  | 0                             | 603                          | 0.237  | 17                            |
|         | 646                          | 0.069  | 1.5                           | 621                          | 0.003  | 0                             |
|         | 648                          | -0.446 | 64.4                          | 640                          | -0.003 | 0                             |
|         | 655                          | -0.041 | 0.6                           | 645                          | -0.428 | 59.1                          |
|         | 690                          | 0.072  | 1.8                           | 669                          | 0      | 0                             |
|         | 699                          | 0      | 0                             | 687                          | 0.074  | 1.9                           |
|         | 744                          | -0.256 | 24.3                          | 720                          | -0.002 | 0                             |
|         | 765                          | 0      | 0                             | 735                          | 0.271  | 26.9                          |
|         | 810                          | 0.171  | 11.8                          | 773                          | 0      | 0                             |
|         | 850                          | 0.118  | 5.9                           | 796                          | 0      | 0                             |
|         | 872                          | 0      | 0                             | 807                          | -0.162 | 10.6                          |
|         | 908                          | 0      | 0                             | 832                          | -0.087 | 3.2                           |
|         | 949                          | -0.123 | 7.2                           | 945                          | -0.211 | 20.9                          |
|         | 960                          | 0.376  | 68                            | 953                          | 0.314  | 46.8                          |
|         | 1052                         | 0.052  | 1.4                           | 1049                         | 0.064  | 2.1                           |
|         | 1077                         | -0.096 | 5                             | 1058                         | -0.011 | 0.1                           |
|         | 1080                         | 0.014  | 0.1                           | 1068                         | 0.095  | 4.9                           |
|         | 1159                         | -0.068 | 2.7                           | 1148                         | -0.037 | 0.8                           |
|         | 1239                         | 0.051  | 1.6                           | 1237                         | 0.036  | 0.8                           |
|         | 1259                         | 0.068  | 2.9                           | 1239                         | 0.088  | 4.8                           |
|         | 1265                         | -0.122 | 9.5                           | 1263                         | -0.056 | 2                             |
|         | 1279                         | -0.109 | 7.6                           | 1272                         | -0.206 | 26.9                          |
|         | 1320                         | -0.271 | 48.4                          | 1289                         | -0.111 | 7.9                           |
|         | 1322                         | -0.118 | 9.2                           | 1293                         | -0.319 | 65.7                          |
|         | 1333                         | -0.41  | 111.7                         | 1299                         | -0.101 | 6.6                           |
|         | 1342                         | -0.039 | 1                             | 1334                         | -0.171 | 19.4                          |
|         | 1368                         | 0.03   | 0.6                           | 1347                         | 0.07   | 3.3                           |
|         | 1404                         | 0.007  | 0                             | 1375                         | 0.045  | 1.4                           |
|         | 1407                         | 0.002  | 0                             | 1397                         | 0.151  | 15.8                          |
|         | 1439                         | -0.221 | 35.3                          | 1404                         | -0.339 | 80.8                          |
|         | 1443                         | -0.362 | 94.4                          | 1425                         | -0.031 | 0.7                           |
|         | 1445                         | -0.121 | 10.7                          | 1427                         | -0.198 | 28.1                          |
|         | 1489                         | -0.001 | 0                             | 1434                         | -0.126 | 11.3                          |
|         | 1530                         | 0.066  | 3.4                           | 1527                         | 0.07   | 3.8                           |
|         | 1537                         | -0.107 | 8.7                           | 1537                         | -0.069 | 3.7                           |
|         | 1552                         | 0.016  | 0.2                           | 1541                         | 0.134  | 13.7                          |
|         | 1599                         | -0.094 | 7.1                           | 1567                         | -0.037 | 1.1                           |
|         | 1643                         | 0.045  | 1.7                           | 1583                         | 0.015  | 0.2                           |
|         | 1680                         | -0.64  | 343.6                         | 1652                         | -0.681 | 382.9                         |
|         | 3044                         | -0.027 | 1.1                           | 3033                         | -0.028 | 1.2                           |
|         | 3116                         | 0.007  | 0.1                           | 3101                         | 0.029  | 1.3                           |
|         | 3117                         | -0.035 | 1.9                           | 3115                         | -0.001 | 0                             |

**Table S13.** Frequency,  $\omega$  ( $\text{cm}^{-1}$ ), Huang-Rhys factors,  $S$ , and relaxation energies,  $\lambda_{\text{rel}}$  (meV), for the totally symmetric vibrations of **1b** in its neutral and anionic state as computed at  $\omega$ -tuned  $\omega\text{B97X-D/cc-pVTZ}$  level of theory. Values are unscaled.

| <b>1b</b>                    |        |                               |                              |        |                               |  |
|------------------------------|--------|-------------------------------|------------------------------|--------|-------------------------------|--|
| Neutral                      |        |                               | Anion                        |        |                               |  |
| $\omega$<br>$\text{cm}^{-1}$ | $S$    | $\lambda_{\text{rel}}$<br>meV | $\omega$<br>$\text{cm}^{-1}$ | $S$    | $\lambda_{\text{rel}}$<br>meV |  |
| 136                          | -0.127 | 1.1                           | 136                          | -0.123 | 0                             |  |
| 164                          | -0.002 | 0                             | 166                          | 0      | 32.4                          |  |
| 187                          | 0.001  | 0                             | 190                          | 0.001  | 32.1                          |  |
| 210                          | 0.403  | 17.1                          | 210                          | 0.555  | 0                             |  |
| 211                          | 0.669  | 47.3                          | 211                          | 0.551  | 0                             |  |
| 268                          | -0.095 | 1.2                           | 260                          | -0.003 | 0                             |  |
| 279                          | 0.024  | 0.1                           | 267                          | 0.076  | 8.1                           |  |
| 297                          | 0.238  | 8.4                           | 278                          | 0.016  | 0.1                           |  |
| 326                          | -0.088 | 1.3                           | 325                          | -0.059 | 0.1                           |  |
| 349                          | -0.008 | 0                             | 342                          | -0.02  | 2.8                           |  |
| 355                          | 0.126  | 2.8                           | 356                          | 0.126  | 1.2                           |  |
| 389                          | 0.004  | 0                             | 387                          | 0.001  | 18.7                          |  |
| 423                          | -0.306 | 19.8                          | 419                          | -0.298 | 0                             |  |
| 479                          | -0.035 | 0.3                           | 474                          | -0.014 | 16                            |  |
| 498                          | 0.253  | 15.9                          | 497                          | 0.254  | 0                             |  |
| 617                          | 0      | 0                             | 607                          | 0      | 72                            |  |
| 651                          | -0.462 | 69.6                          | 630                          | -0.002 | 0                             |  |
| 681                          | 0      | 0                             | 672                          | 0.001  | 4.9                           |  |
| 709                          | -0.115 | 4.7                           | 695                          | -0.002 | 0                             |  |
| 813                          | -0.191 | 14.8                          | 764                          | 0      | 0                             |  |
| 866                          | 0.005  | 0                             | 798                          | 0.001  | 10.9                          |  |
| 871                          | 0      | 0                             | 811                          | 0.013  | 2.7                           |  |
| 898                          | 0.345  | 53.6                          | 846                          | 0      | 0                             |  |
| 918                          | 0      | 0                             | 858                          | -0.002 | 45.3                          |  |
| 924                          | -0.001 | 0                             | 891                          | -0.319 | 3                             |  |
| 1018                         | 0      | 0                             | 988                          | -0.005 | 19.6                          |  |
| 1050                         | -0.074 | 2.9                           | 1034                         | -0.195 | 8                             |  |
| 1066                         | -0.187 | 18.6                          | 1055                         | -0.004 | 5                             |  |
| 1090                         | -0.022 | 0.3                           | 1069                         | -0.002 | 7                             |  |
| 1092                         | 0.093  | 4.7                           | 1070                         | 0.097  | 0.1                           |  |
| 1108                         | 0.122  | 8.3                           | 1101                         | 0.112  | 1.3                           |  |
| 1156                         | -0.09  | 4.6                           | 1144                         | -0.048 | 0.1                           |  |
| 1237                         | 0.01   | 0.1                           | 1235                         | 0.003  | 2.5                           |  |
| 1241                         | -0.041 | 1.1                           | 1235                         | -0.035 | 43.2                          |  |
| 1285                         | -0.039 | 1                             | 1248                         | -0.064 | 13.8                          |  |
| 1287                         | 0.038  | 0.9                           | 1277                         | 0.26   | 79.1                          |  |
| 1288                         | -0.043 | 1.2                           | 1285                         | -0.147 | 3                             |  |
| 1326                         | -0.476 | 150.2                         | 1311                         | -0.068 | 0.8                           |  |
| 1329                         | 0.055  | 2                             | 1312                         | 0.019  | 0.8                           |  |
| 1358                         | -0.06  | 2.5                           | 1314                         | -0.036 | 0                             |  |
| 1365                         | 0.011  | 0.1                           | 1339                         | 0.035  | 14.6                          |  |
| 1391                         | -0.151 | 15.8                          | 1355                         | -0.007 | 6.9                           |  |
| 1402                         | 0.343  | 82.2                          | 1384                         | 0.145  | 8.8                           |  |
| 1406                         | -0.065 | 3                             | 1390                         | -0.1   | 0.1                           |  |
| 1407                         | 0.161  | 18.1                          | 1397                         | 0.01   | 12.3                          |  |
| 1408                         | 0.047  | 1.6                           | 1398                         | 0.011  | 73.1                          |  |
| 1439                         | 0.003  | 0                             | 1408                         | 0.132  | 4                             |  |
| 1440                         | 0.047  | 1.6                           | 1410                         | 0.322  | 3.7                           |  |
| 1442                         | 0.026  | 0.5                           | 1426                         | 0.075  | 1.3                           |  |
| 1450                         | 0.263  | 50.2                          | 1428                         | 0.072  | 5.7                           |  |
| 1464                         | 0.104  | 7.9                           | 1432                         | 0.043  | 0.6                           |  |
| 1510                         | 0.033  | 0.8                           | 1495                         | 0.005  | 1.3                           |  |
| 1566                         | 0.016  | 0.2                           | 1562                         | 0.01   | 3.7                           |  |
| 1569                         | 0.037  | 1.1                           | 1570                         | 0.024  | 12.6                          |  |
| 1572                         | -0.062 | 3                             | 1578                         | -0.069 | 0                             |  |
| 1622                         | -0.088 | 6.3                           | 1587                         | -0.126 | 2.4                           |  |
| 1648                         | -0.007 | 0                             | 1595                         | -0.007 | 0.1                           |  |
| 1651                         | 0.039  | 1.3                           | 1600                         | 0.055  | 486.2                         |  |
| 1704                         | -0.742 | 468.9                         | 1690                         | -0.759 | 0                             |  |
| 3038                         | 0.007  | 0.1                           | 3023                         | 0.021  | 1.5                           |  |
| 3043                         | 0.03   | 1.3                           | 3032                         | 0.031  | 0                             |  |
| 3110                         | -0.006 | 0                             | 3093                         | -0.001 | 1.5                           |  |
| 3116                         | -0.036 | 2                             | 3113                         | 0      | 0                             |  |

**Table S14.** Frequency,  $\omega$  ( $\text{cm}^{-1}$ ), Huang-Rhys factors,  $S$ , and relaxation energies,  $\lambda_{\text{rel}}$  (meV), for the totally symmetric vibrations of **1c** in its neutral and anionic state as computed at  $\omega$ -tuned  $\omega\text{B97X-D/cc-pVTZ}$  level of theory. Values are unscaled.

| <b>1c</b>        |        |                        |                  |        |                        |  |
|------------------|--------|------------------------|------------------|--------|------------------------|--|
| Neutral          |        |                        | Anion            |        |                        |  |
| $\omega$         | $S$    | $\lambda_{\text{rel}}$ | $\omega$         | $S$    | $\lambda_{\text{rel}}$ |  |
| $\text{cm}^{-1}$ |        | meV                    | $\text{cm}^{-1}$ |        | meV                    |  |
| 213              | 0.816  | 70.9                   | 195              | 0.001  | 0                      |  |
| 215              | -0.07  | 0.5                    | 212              | -0.811 | 69.9                   |  |
| 300              | 0.254  | 9.7                    | 270              | 0.048  | 0.3                    |  |
| 330              | 0.026  | 0.1                    | 298              | 0.253  | 9.5                    |  |
| 356              | 0.134  | 3.2                    | 336              | 0.001  | 0                      |  |
| 361              | -0.056 | 0.6                    | 356              | -0.108 | 2.1                    |  |
| 383              | -0.063 | 0.8                    | 361              | -0.119 | 2.6                    |  |
| 424              | -0.148 | 4.7                    | 393              | 0      | 0                      |  |
| 453              | -0.003 | 0                      | 419              | -0.149 | 4.7                    |  |
| 503              | 0.245  | 15.1                   | 502              | 0.244  | 15                     |  |
| 655              | -0.442 | 63.8                   | 630              | -0.001 | 0                      |  |
| 660              | 0.003  | 0                      | 654              | 0.448  | 65.6                   |  |
| 822              | -0.201 | 16.6                   | 752              | 0      | 0                      |  |
| 884              | 0      | 0                      | 820              | -0.134 | 7.4                    |  |
| 885              | 0      | 0                      | 822              | 0.147  | 8.9                    |  |
| 908              | -0.309 | 43.4                   | 864              | 0      | 0                      |  |
| 928              | 0      | 0                      | 902              | -0.277 | 34.7                   |  |
| 938              | -0.118 | 6.5                    | 921              | -0.002 | 0                      |  |
| 940              | 0      | 0                      | 930              | 0.145  | 9.8                    |  |
| 1057             | -0.027 | 0.4                    | 1046             | -0.06  | 1.9                    |  |
| 1079             | -0.145 | 11.4                   | 1066             | -0.134 | 9.5                    |  |
| 1090             | 0.036  | 0.7                    | 1069             | 0.079  | 3.4                    |  |
| 1151             | -0.143 | 11.7                   | 1141             | -0.173 | 17.2                   |  |
| 1167             | -0.087 | 4.4                    | 1155             | -0.046 | 1.2                    |  |
| 1252             | 0      | 0                      | 1247             | -0.048 | 1.5                    |  |
| 1284             | 0.029  | 0.5                    | 1262             | 0.054  | 1.8                    |  |
| 1290             | -0.033 | 0.7                    | 1281             | -0.453 | 131.6                  |  |
| 1303             | 0.127  | 10.5                   | 1296             | 0.176  | 20.1                   |  |
| 1329             | 0.067  | 3                      | 1297             | 0.004  | 0                      |  |
| 1332             | 0.536  | 191.2                  | 1302             | 0.232  | 35.1                   |  |
| 1371             | 0.034  | 0.8                    | 1328             | 0.067  | 3                      |  |
| 1383             | -0.012 | 0.1                    | 1346             | -0.014 | 0.1                    |  |
| 1391             | 0.08   | 4.4                    | 1375             | 0.005  | 0                      |  |
| 1412             | 0.122  | 10.5                   | 1392             | 0.034  | 0.8                    |  |
| 1413             | 0.007  | 0                      | 1397             | 0.081  | 4.6                    |  |
| 1413             | -0.146 | 15.1                   | 1399             | -0.073 | 3.7                    |  |
| 1420             | -0.394 | 110.2                  | 1405             | -0.019 | 0.3                    |  |
| 1445             | -0.062 | 2.7                    | 1418             | -0.039 | 1.1                    |  |
| 1450             | -0.185 | 24.8                   | 1424             | -0.426 | 129.3                  |  |
| 1486             | 0.029  | 0.6                    | 1440             | 0.102  | 7.6                    |  |
| 1490             | -0.058 | 2.5                    | 1444             | -0.099 | 7.1                    |  |
| 1492             | -0.001 | 0                      | 1463             | -0.171 | 21.4                   |  |
| 1496             | -0.242 | 43.9                   | 1493             | 0      | 0                      |  |
| 1502             | 0.075  | 4.2                    | 1494             | 0      | 0                      |  |
| 1521             | -0.002 | 0                      | 1509             | -0.039 | 1.2                    |  |
| 1557             | 0.039  | 1.2                    | 1532             | 0.017  | 0.2                    |  |
| 1567             | -0.059 | 2.7                    | 1562             | -0.013 | 0.1                    |  |
| 1579             | 0.005  | 0                      | 1570             | 0.057  | 2.6                    |  |
| 1629             | 0.005  | 0                      | 1601             | 0.075  | 4.5                    |  |
| 1673             | 0.017  | 0.2                    | 1623             | 0.159  | 20.4                   |  |
| 1719             | -0.801 | 552                    | 1700             | -0.789 | 528.8                  |  |
| 3056             | 0.025  | 1                      | 3045             | 0.029  | 1.3                    |  |
| 3129             | 0.024  | 0.9                    | 3113             | 0.03   | 1.4                    |  |
| 3130             | 0.034  | 1.8                    | 3125             | 0.001  | 0                      |  |
| 3730             | 0.023  | 1                      | 3747             | 0.03   | 1.7                    |  |

**Table S15.** Frequency,  $\omega$  ( $\text{cm}^{-1}$ ), Huang-Rhys factors,  $S$ , and relaxation energies,  $\lambda_{\text{rel}}$  (meV), for the totally symmetric vibrations of **1d** in its neutral and anionic state as computed at  $\omega$ -tuned  $\omega\text{B97X-D/cc-pVTZ}$  level of theory. Values are unscaled.

| <b>1d</b>                    |        |                               |                              |        |                               |  |
|------------------------------|--------|-------------------------------|------------------------------|--------|-------------------------------|--|
| Neutral                      |        |                               | Anion                        |        |                               |  |
| $\omega$<br>$\text{cm}^{-1}$ | $S$    | $\lambda_{\text{rel}}$<br>meV | $\omega$<br>$\text{cm}^{-1}$ | $S$    | $\lambda_{\text{rel}}$<br>meV |  |
| 123                          | -0.184 | 2.1                           | 124                          | -0.19  | 2.2                           |  |
| 208                          | 0.703  | 51.5                          | 208                          | 0.698  | 50.8                          |  |
| 349                          | 0      | 0                             | 352                          | 0.153  | 4.1                           |  |
| 350                          | -0.14  | 3.4                           | 357                          | 0      | 0                             |  |
| 394                          | 0.211  | 8.8                           | 391                          | 0.214  | 9                             |  |
| 472                          | -0.114 | 3.1                           | 453                          | 0      | 0                             |  |
| 494                          | 0.241  | 14.3                          | 469                          | 0.1    | 2.3                           |  |
| 495                          | 0      | 0                             | 492                          | -0.24  | 14.2                          |  |
| 624                          | 0.211  | 13.9                          | 608                          | 0.249  | 18.8                          |  |
| 651                          | 0.477  | 73.9                          | 632                          | 0      | 0                             |  |
| 653                          | 0      | 0                             | 649                          | 0.444  | 64.1                          |  |
| 693                          | -0.153 | 8.1                           | 689                          | -0.178 | 10.9                          |  |
| 747                          | 0.209  | 16.3                          | 729                          | 0      | 0                             |  |
| 759                          | 0      | 0                             | 738                          | -0.208 | 15.9                          |  |
| 813                          | 0.187  | 14.3                          | 784                          | 0      | 0                             |  |
| 849                          | 0.003  | 0                             | 812                          | 0.179  | 13                            |  |
| 888                          | -0.104 | 4.8                           | 843                          | 0      | 0                             |  |
| 941                          | 0      | 0                             | 881                          | 0.071  | 2.2                           |  |
| 966                          | -0.319 | 49.2                          | 955                          | -0.309 | 45.5                          |  |
| 1053                         | -0.044 | 1                             | 1050                         | -0.05  | 1.3                           |  |
| 1091                         | 0.082  | 3.7                           | 1080                         | 0.103  | 5.8                           |  |
| 1158                         | 0.099  | 5.6                           | 1149                         | 0.051  | 1.5                           |  |
| 1237                         | 0      | 0                             | 1227                         | 0.042  | 1.1                           |  |
| 1264                         | 0      | 0                             | 1251                         | -0.098 | 6                             |  |
| 1271                         | -0.169 | 18.1                          | 1267                         | 0      | 0                             |  |
| 1279                         | -0.045 | 1.3                           | 1271                         | -0.147 | 13.7                          |  |
| 1319                         | 0.185  | 22.5                          | 1294                         | 0.355  | 81.8                          |  |
| 1332                         | 0.435  | 126                           | 1301                         | 0.127  | 10.4                          |  |
| 1341                         | 0      | 0                             | 1328                         | 0.079  | 4.2                           |  |
| 1382                         | -0.068 | 3.2                           | 1354                         | -0.076 | 3.9                           |  |
| 1420                         | -0.06  | 2.6                           | 1400                         | 0      | 0                             |  |
| 1440                         | 0      | 0                             | 1407                         | 0.447  | 140.4                         |  |
| 1440                         | -0.208 | 31.3                          | 1425                         | 0      | 0                             |  |
| 1445                         | 0.39   | 110.2                         | 1431                         | 0      | 0                             |  |
| 1491                         | 0      | 0                             | 1484                         | -0.074 | 4.1                           |  |
| 1493                         | 0.041  | 1.2                           | 1490                         | 0.001  | 0                             |  |
| 1503                         | -0.051 | 2                             | 1495                         | 0      | 0                             |  |
| 1513                         | -0.043 | 1.4                           | 1505                         | 0      | 0                             |  |
| 1516                         | 0      | 0                             | 1507                         | 0.05   | 1.9                           |  |
| 1521                         | -0.09  | 6.1                           | 1509                         | 0      | 0                             |  |
| 1526                         | 0      | 0                             | 1523                         | 0.078  | 4.7                           |  |
| 1588                         | 0.169  | 22.6                          | 1564                         | 0.142  | 15.7                          |  |
| 1649                         | 0.032  | 0.9                           | 1584                         | 0.089  | 6.2                           |  |
| 1681                         | 0.637  | 341.2                         | 1653                         | 0.672  | 373.8                         |  |
| 3044                         | 0.031  | 1.5                           | 3034                         | 0.034  | 1.7                           |  |
| 3117                         | 0.037  | 2.2                           | 3101                         | 0.035  | 1.9                           |  |



**Table S16.** Frequency,  $\omega$  ( $\text{cm}^{-1}$ ), Huang-Rhys factors,  $S$ , and relaxation energies,  $\lambda_{\text{rel}}$  (meV), for the totally symmetric vibrations of **1e** in its neutral and anionic state as computed at  $\omega$ -tuned  $\omega\text{B97X-D/cc-pVTZ}$  level of theory. Values are unscaled.

| 1e      |                              |        |                               |                              |        |                               |
|---------|------------------------------|--------|-------------------------------|------------------------------|--------|-------------------------------|
| Neutral |                              |        | Anion                         |                              |        |                               |
|         | $\omega$<br>$\text{cm}^{-1}$ | $S$    | $\lambda_{\text{rel}}$<br>meV | $\omega$<br>$\text{cm}^{-1}$ | $S$    | $\lambda_{\text{rel}}$<br>meV |
|         | 210                          | 0.707  | 52.5                          | 210                          | 0.7    | 51.4                          |
|         | 262                          | 0.156  | 3.2                           | 262                          | 0.145  | 2.7                           |
|         | 289                          | 0.212  | 6.5                           | 289                          | 0.232  | 7.8                           |
|         | 327                          | -0.132 | 2.8                           | 328                          | -0.12  | 2.4                           |
|         | 357                          | 0.12   | 2.6                           | 357                          | 0.127  | 2.9                           |
|         | 488                          | -0.252 | 15.5                          | 489                          | -0.242 | 14.4                          |
|         | 637                          | 0.335  | 35.9                          | 624                          | 0      | 0                             |
|         | 639                          | 0.084  | 2.3                           | 624                          | 0.036  | 0.4                           |
|         | 642                          | 0      | 0                             | 638                          | -0.335 | 35.8                          |
|         | 679                          | -0.27  | 24.8                          | 674                          | -0.288 | 28                            |
|         | 813                          | -0.184 | 13.8                          | 794                          | 0      | 0                             |
|         | 879                          | 0.023  | 0.2                           | 812                          | 0.18   | 13.1                          |
|         | 904                          | -0.215 | 20.9                          | 840                          | 0      | 0                             |
|         | 928                          | 0      | 0                             | 899                          | -0.184 | 15.2                          |
|         | 1049                         | 0      | 0                             | 1047                         | -0.279 | 40.8                          |
|         | 1056                         | 0      | 0                             | 1049                         | -0.242 | 30.8                          |
|         | 1063                         | -0.373 | 74.2                          | 1055                         | 0      | 0                             |
|         | 1093                         | 0.071  | 2.7                           | 1071                         | 0.035  | 0.7                           |
|         | 1120                         | -0.005 | 0                             | 1103                         | -0.054 | 1.6                           |
|         | 1168                         | 0.065  | 2.4                           | 1158                         | 0.112  | 7.3                           |
|         | 1214                         | 0.148  | 13.3                          | 1193                         | 0.011  | 0.1                           |
|         | 1224                         | 0.035  | 0.7                           | 1204                         | 0.077  | 3.6                           |
|         | 1273                         | -0.36  | 82.4                          | 1259                         | -0.124 | 9.7                           |
|         | 1303                         | -0.021 | 0.3                           | 1275                         | -0.415 | 109.7                         |
|         | 1311                         | -0.459 | 138.1                         | 1290                         | -0.281 | 50.8                          |
|         | 1322                         | 0.061  | 2.5                           | 1293                         | 0.127  | 10.5                          |
|         | 1349                         | 0.131  | 11.6                          | 1334                         | 0.003  | 0                             |
|         | 1365                         | 0      | 0                             | 1344                         | -0.263 | 46.7                          |
|         | 1379                         | 0.418  | 120.6                         | 1372                         | 0.122  | 10.2                          |
|         | 1388                         | 0.051  | 1.8                           | 1372                         | 0.002  | 0                             |
|         | 1389                         | 0      | 0                             | 1396                         | -0.267 | 49.6                          |
|         | 1407                         | 0      | 0                             | 1400                         | 0.327  | 75                            |
|         | 1476                         | 0.222  | 36.5                          | 1453                         | 0.043  | 1.4                           |
|         | 1528                         | 0.041  | 1.3                           | 1520                         | 0      | 0                             |
|         | 1531                         | 0      | 0                             | 1526                         | 0.084  | 5.4                           |
|         | 1549                         | 0.11   | 9.3                           | 1529                         | 0.135  | 13.8                          |
|         | 1581                         | 0      | 0                             | 1539                         | 0.058  | 2.6                           |
|         | 1637                         | -0.052 | 2.2                           | 1543                         | 0      | 0                             |
|         | 1648                         | 0.128  | 13.5                          | 1603                         | 0      | 0                             |
|         | 1676                         | 0.092  | 7.1                           | 1645                         | 0.202  | 33.6                          |
|         | 1679                         | 0.582  | 284                           | 1646                         | 0      | 0                             |
|         | 1679                         | 0      | 0                             | 1650                         | 0.582  | 279.8                         |
|         | 3043                         | -0.032 | 1.5                           | 3033                         | -0.033 | 1.7                           |
|         | 3114                         | 0      | 0                             | 3100                         | -0.035 | 1.9                           |
|         | 3116                         | 0.041  | 2.6                           | 3113                         | 0      | 0                             |

**Table S17.** Frequency,  $\omega$  ( $\text{cm}^{-1}$ ), Huang-Rhys factors,  $S$ , and relaxation energies,  $\lambda_{\text{rel}}$  (meV), for the totally symmetric vibrations of **PY** in its neutral and anionic state as computed at  $\omega$ -tuned  $\omega\text{B97X-D/cc-pVTZ}$  level of theory. Values are unscaled.

| PY      |                              |        |                               |                              |        |                               |
|---------|------------------------------|--------|-------------------------------|------------------------------|--------|-------------------------------|
| Neutral |                              |        | Anion                         |                              |        |                               |
|         | $\omega$<br>$\text{cm}^{-1}$ | $S$    | $\lambda_{\text{rel}}$<br>meV | $\omega$<br>$\text{cm}^{-1}$ | $S$    | $\lambda_{\text{rel}}$<br>meV |
|         | 422                          | -0.932 | 183.3                         | 419                          | -0.925 | 179.4                         |
|         | 615                          | -0.306 | 28.8                          | 614                          | -0.349 | 37.4                          |
|         | 835                          | 0.475  | 94.1                          | 762                          | 0      | 0                             |
|         | 901                          | 0      | 0                             | 834                          | -0.438 | 80                            |
|         | 1125                         | 0.092  | 4.7                           | 1114                         | 0.104  | 6.1                           |
|         | 1201                         | -0.246 | 36.4                          | 1175                         | -0.342 | 68.8                          |
|         | 1294                         | -0.801 | 415.3                         | 1255                         | -0.001 | 0                             |
|         | 1295                         | 0.139  | 12.6                          | 1275                         | 0      | 0                             |
|         | 1297                         | 0      | 0                             | 1278                         | 0.595  | 226.2                         |
|         | 1390                         | 0.101  | 7.1                           | 1354                         | 0.001  | 0                             |
|         | 1415                         | 0      | 0                             | 1385                         | 0.426  | 126                           |
|         | 1488                         | 0.586  | 255.4                         | 1425                         | 0.578  | 237.9                         |
|         | 1667                         | -0.149 | 18.6                          | 1601                         | -0.161 | 20.8                          |
|         | 1763                         | 0.776  | 531.2                         | 1722                         | 0.779  | 522.4                         |
|         | 3219                         | 0.001  | 0                             | 3179                         | 0.041  | 2.6                           |
|         | 3221                         | 0.035  | 1.9                           | 3182                         | 0      | 0                             |
|         | 3239                         | 0      | 0                             | 3205                         | 0.029  | 1.4                           |
|         | 3248                         | -0.037 | 2.3                           | 3218                         | -0.029 | 1.3                           |

**Table S18.** Frequency,  $\omega$  ( $\text{cm}^{-1}$ ), Huang-Rhys factors,  $S$ , and relaxation energies,  $\lambda_{\text{rel}}$  (meV), for the totally symmetric vibrations of **2** in its neutral and anionic state as computed at  $\omega$ -tuned  $\omega\text{B97X-D/cc-pVTZ}$  level of theory. Values are unscaled. Values are unscaled.

| 2                |        |                        |                  |        |                        |  |
|------------------|--------|------------------------|------------------|--------|------------------------|--|
| Neutral          |        |                        | Anion            |        |                        |  |
| $\omega$         | $S$    | $\lambda_{\text{rel}}$ | $\omega$         | $S$    | $\lambda_{\text{rel}}$ |  |
| $\text{cm}^{-1}$ |        | meV                    | $\text{cm}^{-1}$ |        | meV                    |  |
| 184              | 0.247  | 5.6                    | 188              | 0.295  | 8.2                    |  |
| 216              | -0.815 | 71.7                   | 217              | -0.795 | 68.5                   |  |
| 320              | -0.254 | 10.4                   | 320              | -0.271 | 11.7                   |  |
| 468              | -0.336 | 26.5                   | 467              | -0.315 | 23.2                   |  |
| 487              | -0.073 | 1.3                    | 482              | -0.071 | 1.2                    |  |
| 665              | -0.51  | 86.6                   | 664              | -0.518 | 89                     |  |
| 822              | -0.161 | 10.6                   | 774              | 0      | 0                      |  |
| 919              | 0      | 0                      | 822              | 0.144  | 8.5                    |  |
| 939              | -0.323 | 49                     | 866              | 0      | 0                      |  |
| 952              | 0.125  | 7.4                    | 938              | 0.269  | 34                     |  |
| 969              | 0      | 0                      | 949              | -0.151 | 10.8                   |  |
| 1145             | 0.008  | 0                      | 1135             | 0.112  | 7.1                    |  |
| 1147             | -0.011 | 0.1                    | 1160             | -0.122 | 8.6                    |  |
| 1173             | 0      | 0                      | 1168             | 0.28   | 45.8                   |  |
| 1187             | 0.285  | 48.3                   | 1181             | 0      | 0                      |  |
| 1261             | 0.301  | 57.1                   | 1256             | 0.128  | 10.3                   |  |
| 1296             | -0.076 | 3.8                    | 1274             | -0.217 | 30.1                   |  |
| 1321             | 0      | 0                      | 1305             | 0.42   | 114.9                  |  |
| 1329             | -0.59  | 231                    | 1306             | 0      | 0                      |  |
| 1378             | -0.066 | 3                      | 1364             | -0.048 | 1.6                    |  |
| 1401             | 0.018  | 0.2                    | 1371             | 0.347  | 82.5                   |  |
| 1403             | 0      | 0                      | 1384             | 0.061  | 2.6                    |  |
| 1420             | 0.028  | 0.6                    | 1404             | 0.061  | 2.6                    |  |
| 1439             | -0.033 | 0.8                    | 1413             | -0.429 | 130.2                  |  |
| 1470             | -0.424 | 132.5                  | 1428             | 0      | 0                      |  |
| 1488             | 0      | 0                      | 1428             | -0.043 | 1.3                    |  |
| 1635             | -0.138 | 15.6                   | 1585             | -0.098 | 7.6                    |  |
| 1655             | 0.089  | 6.5                    | 1594             | 0      | 0                      |  |
| 1664             | 0      | 0                      | 1596             | 0.079  | 5                      |  |
| 1709             | -0.675 | 389.9                  | 1677             | -0.695 | 405                    |  |
| 3038             | 0      | 0                      | 3022             | 0.029  | 1.2                    |  |
| 3043             | -0.038 | 2.3                    | 3031             | -0.04  | 2.4                    |  |
| 3115             | 0      | 0                      | 3098             | -0.039 | 2.4                    |  |
| 3116             | -0.047 | 3.4                    | 3113             | 0      | 0                      |  |
| 3197             | -0.03  | 1.4                    | 3166             | -0.031 | 1.5                    |  |

**Table S19.** Frequency,  $\omega$  ( $\text{cm}^{-1}$ ), Huang-Rhys factors,  $S$ , and relaxation energies,  $\lambda_{\text{rel}}$  (meV), for the totally symmetric vibrations of **TC** in its neutral and anionic state as computed at  $\omega$ -tuned  $\omega\text{B97X-D/cc-pVTZ}$  level of theory. Values are unscaled.

| TC      |                              |        |                               |                              |        |                               |
|---------|------------------------------|--------|-------------------------------|------------------------------|--------|-------------------------------|
| Neutral |                              |        | Anion                         |                              |        |                               |
|         | $\omega$<br>$\text{cm}^{-1}$ | $S$    | $\lambda_{\text{rel}}$<br>meV | $\omega$<br>$\text{cm}^{-1}$ | $S$    | $\lambda_{\text{rel}}$<br>meV |
|         | 321                          | -1.061 | 180.5                         | 304                          | -0.001 | 0                             |
|         | 322                          | 0      | 0                             | 319                          | 1.062  | 180.1                         |
|         | 637                          | 0.377  | 45.3                          | 636                          | 0.371  | 43.7                          |
|         | 776                          | -0.094 | 3.4                           | 762                          | -0.089 | 3                             |
|         | 883                          | -0.125 | 6.9                           | 827                          | 0      | 0                             |
|         | 941                          | 0      | 0                             | 881                          | -0.09  | 3.6                           |
|         | 1031                         | 0.112  | 6.5                           | 1051                         | 0.055  | 1.6                           |
|         | 1197                         | 0.28   | 46.9                          | 1178                         | 0.293  | 50.7                          |
|         | 1235                         | -0.421 | 109.6                         | 1237                         | -0.369 | 84.4                          |
|         | 1429                         | 0      | 0                             | 1406                         | -0.438 | 134.7                         |
|         | 1434                         | 0.583  | 243.5                         | 1412                         | 0      | 0                             |
|         | 1453                         | -0.352 | 90.1                          | 1423                         | 0      | 0                             |
|         | 1467                         | 0      | 0                             | 1428                         | 0.58   | 240.2                         |
|         | 1496                         | 0.259  | 50.2                          | 1477                         | 0      | 0                             |
|         | 1498                         | 0.002  | 0                             | 1483                         | 0.067  | 3.4                           |
|         | 1584                         | 0.041  | 1.3                           | 1528                         | 0.001  | 0                             |
|         | 1613                         | 0.335  | 90.3                          | 1551                         | 0.288  | 64.2                          |
|         | 1685                         | 0      | 0                             | 1598                         | -0.24  | 45.9                          |
|         | 3187                         | 0.026  | 1.1                           | 3155                         | 0.03   | 1.5                           |
|         | 3215                         | 0.04   | 2.6                           | 3188                         | 0.046  | 3.4                           |

**Table S20.** Frequency,  $\omega$  ( $\text{cm}^{-1}$ ), Huang-Rhys factors,  $S$ , and relaxation energies,  $\lambda_{\text{rel}}$  (meV), for the totally symmetric vibrations of **1a** in its neutral and cationic state as computed at  $\omega$ -tuned  $\omega\text{B97X-D/cc-pVTZ}$  level of theory. Values are unscaled.

| 1a               |        |                        |                  |        |                        |  |
|------------------|--------|------------------------|------------------|--------|------------------------|--|
| Neutral          |        |                        | Cation           |        |                        |  |
| $\omega$         | $S$    | $\lambda_{\text{rel}}$ | $\omega$         | $S$    | $\lambda_{\text{rel}}$ |  |
| $\text{cm}^{-1}$ |        | meV                    | $\text{cm}^{-1}$ |        | meV                    |  |
| 210              | 0.36   | 13.6                   | 209              | 0.354  | 13                     |  |
| 246              | -0.231 | 6.6                    | 242              | -0.231 | 6.5                    |  |
| 287              | 0.258  | 9.5                    | 282              | 0      | 0                      |  |
| 293              | 0.011  | 0                      | 287              | 0.275  | 10.8                   |  |
| 299              | -0.1   | 1.5                    | 295              | -0.026 | 0.1                    |  |
| 305              | 0.002  | 0                      | 299              | 0.128  | 2.4                    |  |
| 320              | -0.09  | 1.3                    | 319              | -0.071 | 0.8                    |  |
| 351              | 0.101  | 1.8                    | 348              | 0.002  | 0                      |  |
| 353              | 0.112  | 2.2                    | 351              | 0.03   | 0.2                    |  |
| 354              | -0.039 | 0.3                    | 353              | -0.119 | 2.5                    |  |
| 394              | -0.34  | 22.7                   | 389              | -0.374 | 27.2                   |  |
| 472              | -0.07  | 1.2                    | 470              | -0.05  | 0.6                    |  |
| 493              | -0.08  | 1.6                    | 484              | -0.007 | 0                      |  |
| 504              | 0      | 0                      | 494              | -0.099 | 2.4                    |  |
| 620              | -0.281 | 24.5                   | 614              | -0.029 | 0.3                    |  |
| 623              | 0.005  | 0                      | 616              | 0.279  | 23.9                   |  |
| 648              | 0.156  | 7.9                    | 634              | 0.002  | 0                      |  |
| 655              | 0.002  | 0                      | 649              | 0.136  | 6                      |  |
| 671              | 0      | 0                      | 650              | 0.07   | 1.6                    |  |
| 690              | 0.081  | 2.3                    | 691              | 0.085  | 2.5                    |  |
| 744              | -0.184 | 12.6                   | 739              | -0.192 | 13.7                   |  |
| 810              | -0.116 | 5.4                    | 809              | -0.109 | 4.8                    |  |
| 850              | -0.226 | 21.7                   | 831              | -0.228 | 21.6                   |  |
| 942              | -0.001 | 0                      | 951              | -0.109 | 5.6                    |  |
| 949              | 0.077  | 2.8                    | 953              | 0.019  | 0.2                    |  |
| 960              | -0.234 | 26.3                   | 958              | -0.221 | 23.4                   |  |
| 1077             | 0.126  | 8.5                    | 1078             | 0.131  | 9.2                    |  |
| 1129             | 0.072  | 2.9                    | 1133             | 0.093  | 4.9                    |  |
| 1159             | 0.12   | 8.3                    | 1158             | 0.138  | 11.1                   |  |
| 1239             | 0.043  | 1.1                    | 1244             | 0.056  | 1.9                    |  |
| 1259             | 0.072  | 3.3                    | 1260             | 0.045  | 1.3                    |  |
| 1265             | -0.082 | 4.2                    | 1273             | -0.044 | 1.2                    |  |
| 1279             | -0.227 | 33                     | 1282             | -0.12  | 9.2                    |  |
| 1285             | -0.01  | 0.1                    | 1286             | -0.155 | 15.4                   |  |
| 1320             | -0.134 | 11.9                   | 1302             | -0.103 | 6.9                    |  |
| 1322             | -0.103 | 7                      | 1312             | -0.202 | 26.8                   |  |
| 1333             | -0.267 | 47.3                   | 1350             | -0.197 | 26.3                   |  |
| 1342             | 0.214  | 30.8                   | 1354             | 0.023  | 0.4                    |  |
| 1368             | 0.047  | 1.5                    | 1366             | 0.201  | 27.5                   |  |
| 1388             | -0.112 | 8.7                    | 1368             | -0.221 | 33.5                   |  |
| 1407             | 0      | 0                      | 1413             | 0.107  | 8.2                    |  |
| 1408             | -0.006 | 0                      | 1415             | -0.063 | 2.8                    |  |
| 1426             | 0.053  | 2                      | 1415             | 0.026  | 0.5                    |  |
| 1439             | -0.113 | 9.1                    | 1423             | -0.189 | 25.3                   |  |
| 1439             | 0.016  | 0.2                    | 1429             | 0.348  | 86.7                   |  |
| 1443             | -0.356 | 91.3                   | 1446             | -0.041 | 1.2                    |  |
| 1445             | -0.104 | 7.8                    | 1447             | -0.001 | 0                      |  |
| 1452             | -0.005 | 0                      | 1453             | -0.22  | 35.1                   |  |
| 1490             | -0.045 | 1.5                    | 1489             | 0      | 0                      |  |
| 1497             | -0.038 | 1.1                    | 1493             | -0.001 | 0                      |  |
| 1509             | -0.047 | 1.7                    | 1510             | -0.03  | 0.7                    |  |
| 1530             | 0.05   | 1.9                    | 1527             | 0.067  | 3.5                    |  |
| 1537             | -0.229 | 40.5                   | 1531             | -0.065 | 3.3                    |  |
| 1599             | -0.296 | 70.1                   | 1562             | -0.15  | 17.5                   |  |
| 1612             | -0.057 | 2.7                    | 1567             | -0.212 | 35.4                   |  |
| 1643             | 0.106  | 9.3                    | 1596             | 0.09   | 6.4                    |  |
| 1680             | -0.508 | 216.3                  | 1661             | -0.473 | 185.9                  |  |
| 3117             | 0.028  | 1.2                    | 3126             | 0.001  | 0                      |  |
| 3124             | -0.01  | 0.2                    | 3131             | -0.03  | 1.4                    |  |

**Table S21.** Frequency,  $\omega$  ( $\text{cm}^{-1}$ ), Huang-Rhys factors,  $S$ , and relaxation energies,  $\lambda_{\text{rel}}$  (meV), for the totally symmetric vibrations of **1b** in its neutral and cationic state as computed at  $\omega$ -tuned  $\omega\text{B97X-D/cc-pVTZ}$  level of theory. Values are unscaled.

| <b>1b</b>        |        |                        |                  |        |                        |  |
|------------------|--------|------------------------|------------------|--------|------------------------|--|
| Neutral          |        |                        | Cation           |        |                        |  |
| $\omega$         | $S$    | $\lambda_{\text{rel}}$ | $\omega$         | $S$    | $\lambda_{\text{rel}}$ |  |
| $\text{cm}^{-1}$ |        | meV                    | $\text{cm}^{-1}$ |        | meV                    |  |
| 210              | 0.154  | 2.5                    | 209              | 0.318  | 10.6                   |  |
| 211              | 0.289  | 8.8                    | 212              | 0.081  | 0.7                    |  |
| 255              | -0.116 | 1.7                    | 250              | -0.041 | 0.2                    |  |
| 258              | -0.006 | 0                      | 251              | -0.111 | 1.6                    |  |
| 297              | 0.133  | 2.6                    | 290              | 0.009  | 0                      |  |
| 300              | 0.006  | 0                      | 294              | 0.123  | 2.2                    |  |
| 349              | 0.369  | 23.8                   | 346              | 0.009  | 0                      |  |
| 352              | -0.265 | 12.3                   | 351              | -0.032 | 0.2                    |  |
| 355              | 0.212  | 7.9                    | 352              | 0.229  | 9.2                    |  |
| 358              | -0.039 | 0.3                    | 358              | -0.468 | 39.2                   |  |
| 423              | -0.074 | 1.1                    | 416              | -0.091 | 1.7                    |  |
| 498              | 0.076  | 1.4                    | 499              | 0.074  | 1.4                    |  |
| 651              | 0.187  | 11.3                   | 627              | 0.001  | 0                      |  |
| 681              | 0      | 0                      | 652              | -0.172 | 9.6                    |  |
| 709              | 0.039  | 0.5                    | 708              | 0.056  | 1.1                    |  |
| 751              | -0.057 | 1.2                    | 748              | -0.049 | 0.9                    |  |
| 792              | 0      | 0                      | 812              | -0.077 | 2.4                    |  |
| 813              | 0.082  | 2.7                    | 822              | 0      | 0                      |  |
| 886              | 0      | 0                      | 895              | -0.183 | 15                     |  |
| 898              | 0.138  | 8.5                    | 919              | 0.343  | 53.9                   |  |
| 923              | 0.341  | 53.8                   | 932              | 0.002  | 0                      |  |
| 924              | -0.056 | 1.4                    | 935              | -0.002 | 0                      |  |
| 1050             | 0.056  | 1.7                    | 1049             | 0.042  | 0.9                    |  |
| 1066             | 0.132  | 9.3                    | 1058             | 0.045  | 1.1                    |  |
| 1090             | -0.015 | 0.1                    | 1091             | -0.111 | 6.7                    |  |
| 1108             | -0.151 | 12.6                   | 1106             | -0.137 | 10.4                   |  |
| 1149             | 0.017  | 0.2                    | 1151             | 0.091  | 4.8                    |  |
| 1156             | 0.21   | 25.5                   | 1153             | 0.14   | 11.3                   |  |
| 1174             | 0.013  | 0.1                    | 1160             | 0.051  | 1.5                    |  |
| 1195             | -0.027 | 0.4                    | 1179             | -0.206 | 25.1                   |  |
| 1196             | 0.154  | 14.1                   | 1192             | 0.015  | 0.1                    |  |
| 1285             | -0.09  | 5.2                    | 1284             | -0.131 | 11                     |  |
| 1287             | -0.014 | 0.1                    | 1285             | -0.098 | 6.1                    |  |
| 1288             | -0.143 | 13.3                   | 1291             | -0.033 | 0.7                    |  |
| 1290             | 0.002  | 0                      | 1313             | 0.227  | 33.9                   |  |
| 1326             | -0.37  | 90.9                   | 1319             | -0.147 | 14.2                   |  |
| 1358             | -0.087 | 5.1                    | 1357             | -0.139 | 13                     |  |
| 1365             | 0.008  | 0                      | 1365             | 0.117  | 9.3                    |  |
| 1391             | -0.081 | 4.6                    | 1389             | -0.043 | 1.3                    |  |
| 1402             | -0.093 | 6.1                    | 1400             | -0.06  | 2.5                    |  |
| 1406             | 0.017  | 0.2                    | 1408             | 0.336  | 79.7                   |  |
| 1407             | 0.002  | 0                      | 1414             | 0.055  | 2.1                    |  |
| 1407             | -0.039 | 1.1                    | 1414             | -0.033 | 0.7                    |  |
| 1408             | -0.001 | 0                      | 1415             | -0.049 | 1.7                    |  |
| 1439             | 0      | 0                      | 1418             | -0.027 | 0.5                    |  |
| 1440             | -0.015 | 0.2                    | 1441             | -0.07  | 3.5                    |  |
| 1442             | 0.045  | 1.5                    | 1447             | 0.005  | 0                      |  |
| 1450             | 0.196  | 27.9                   | 1447             | 0.001  | 0                      |  |
| 1464             | 0.076  | 4.2                    | 1450             | 0.02   | 0.3                    |  |
| 1469             | 0.009  | 0.1                    | 1467             | 0.189  | 26.3                   |  |
| 1526             | -0.061 | 2.8                    | 1522             | -0.037 | 1                      |  |
| 1569             | 0.114  | 10.1                   | 1557             | 0.083  | 5.3                    |  |
| 1572             | -0.164 | 21.1                   | 1571             | -0.038 | 1.2                    |  |
| 1622             | 0.194  | 30.5                   | 1586             | 0.225  | 40.3                   |  |
| 1651             | 0.074  | 4.5                    | 1615             | 0.019  | 0.3                    |  |
| 1704             | -0.604 | 311.3                  | 1686             | -0.552 | 257.2                  |  |
| 3116             | 0.028  | 1.2                    | 3126             | 0.002  | 0                      |  |
| 3125             | 0.01   | 0.2                    | 3131             | 0.03   | 1.4                    |  |

**Table S22.** Frequency,  $\omega$  ( $\text{cm}^{-1}$ ), Huang-Rhys factors,  $S$ , and relaxation energies,  $\lambda_{\text{rel}}$  (meV), for the totally symmetric vibrations of **1c** in its neutral and cationic state as computed at  $\omega$ -tuned  $\omega\text{B97X-D/cc-pVTZ}$  level of theory. Values are unscaled.

| 1c                           |        |                               |                              |        |                               |  |
|------------------------------|--------|-------------------------------|------------------------------|--------|-------------------------------|--|
| Neutral                      |        |                               | Cation                       |        |                               |  |
| $\omega$<br>$\text{cm}^{-1}$ | $S$    | $\lambda_{\text{rel}}$<br>meV | $\omega$<br>$\text{cm}^{-1}$ | $S$    | $\lambda_{\text{rel}}$<br>meV |  |
| 137                          | -0.012 | 0                             | 138                          | -0.145 | 1.5                           |  |
| 138                          | -0.148 | 1.5                           | 149                          | -0.002 | 0                             |  |
| 213                          | 0.298  | 9.4                           | 212                          | 0.303  | 9.7                           |  |
| 215                          | -0.028 | 0.1                           | 216                          | -0.031 | 0.1                           |  |
| 300                          | 0.101  | 1.5                           | 299                          | 0.103  | 1.6                           |  |
| 356                          | 0.368  | 24.1                          | 357                          | 0.03   | 0.2                           |  |
| 358                          | -0.174 | 5.4                           | 359                          | -0.042 | 0.3                           |  |
| 360                          | -0.073 | 1                             | 362                          | -0.045 | 0.4                           |  |
| 361                          | -0.227 | 9.3                           | 364                          | -0.48  | 42                            |  |
| 424                          | -0.115 | 2.8                           | 416                          | -0.135 | 3.8                           |  |
| 655                          | 0.214  | 15.1                          | 631                          | 0      | 0                             |  |
| 686                          | 0.001  | 0                             | 658                          | 0.196  | 12.7                          |  |
| 731                          | 0      | 0                             | 748                          | 0.073  | 2                             |  |
| 753                          | 0.073  | 2                             | 749                          | 0      | 0                             |  |
| 822                          | 0.091  | 3.4                           | 821                          | 0.085  | 2.9                           |  |
| 884                          | 0      | 0                             | 904                          | -0.26  | 30.5                          |  |
| 908                          | -0.193 | 16.9                          | 931                          | -0.425 | 84                            |  |
| 938                          | 0.441  | 91.3                          | 952                          | 0.001  | 0                             |  |
| 1079                         | 0.064  | 2.2                           | 1070                         | 0.013  | 0.1                           |  |
| 1090                         | -0.069 | 2.6                           | 1095                         | -0.079 | 3.4                           |  |
| 1151                         | 0.092  | 4.8                           | 1128                         | 0.052  | 1.5                           |  |
| 1167                         | 0.14   | 11.5                          | 1159                         | 0.063  | 2.3                           |  |
| 1171                         | 0.003  | 0                             | 1171                         | 0.22   | 28.4                          |  |
| 1179                         | 0.161  | 15.4                          | 1175                         | 0      | 0                             |  |
| 1290                         | -0.046 | 1.3                           | 1294                         | -0.082 | 4.4                           |  |
| 1300                         | 0.052  | 1.7                           | 1300                         | 0.001  | 0                             |  |
| 1303                         | 0.195  | 24.7                          | 1306                         | 0.115  | 8.6                           |  |
| 1329                         | 0.051  | 1.7                           | 1315                         | 0.061  | 2.4                           |  |
| 1332                         | 0.368  | 90.1                          | 1324                         | 0.307  | 62.3                          |  |
| 1371                         | 0.057  | 2.2                           | 1364                         | 0.066  | 2.9                           |  |
| 1391                         | 0.111  | 8.6                           | 1390                         | 0.011  | 0.1                           |  |
| 1412                         | -0.016 | 0.2                           | 1417                         | -0.309 | 67.8                          |  |
| 1413                         | -0.001 | 0                             | 1418                         | -0.041 | 1.2                           |  |
| 1414                         | 0.001  | 0                             | 1420                         | 0.114  | 9.2                           |  |
| 1420                         | 0.014  | 0.1                           | 1422                         | 0.161  | 18.4                          |  |
| 1445                         | -0.025 | 0.5                           | 1423                         | -0.221 | 34.9                          |  |
| 1445                         | -0.033 | 0.8                           | 1437                         | -0.307 | 67.7                          |  |
| 1450                         | -0.392 | 111.3                         | 1442                         | -0.091 | 6                             |  |
| 1452                         | 0.043  | 1.3                           | 1452                         | 0.019  | 0.3                           |  |
| 1468                         | 0.003  | 0                             | 1453                         | 0.04   | 1.2                           |  |
| 1490                         | -0.035 | 0.9                           | 1466                         | -0.134 | 13.1                          |  |
| 1504                         | 0.005  | 0                             | 1508                         | 0.075  | 4.3                           |  |
| 1514                         | 0.044  | 1.5                           | 1516                         | 0.038  | 1.1                           |  |
| 1553                         | -0.076 | 4.5                           | 1534                         | -0.007 | 0                             |  |
| 1557                         | 0.212  | 34.9                          | 1541                         | 0.059  | 2.7                           |  |
| 1567                         | 0.129  | 12.9                          | 1565                         | 0.141  | 15.6                          |  |
| 1579                         | -0.001 | 0                             | 1568                         | -0.151 | 17.9                          |  |
| 1629                         | 0.275  | 61.5                          | 1605                         | 0.209  | 34.9                          |  |
| 1673                         | 0.06   | 3                             | 1632                         | 0.023  | 0.4                           |  |
| 1719                         | -0.575 | 284                           | 1699                         | -0.513 | 223.4                         |  |
| 3130                         | -0.027 | 1.1                           | 3137                         | -0.004 | 0                             |  |
| 3139                         | 0.012  | 0.2                           | 3144                         | 0.031  | 1.5                           |  |

**Table S23.** Frequency,  $\omega$  ( $\text{cm}^{-1}$ ), Huang-Rhys factors,  $S$ , and relaxation energies,  $\lambda_{\text{rel}}$  (meV), for the totally symmetric vibrations of **1d** in its neutral and cationic state as computed at  $\omega$ -tuned  $\omega\text{B97X-D/cc-pVTZ}$  level of theory. Values are unscaled.

| <b>1d</b> |                              |        |                               |                              |        |                               |
|-----------|------------------------------|--------|-------------------------------|------------------------------|--------|-------------------------------|
| Neutral   |                              |        | Cation                        |                              |        |                               |
|           | $\omega$<br>$\text{cm}^{-1}$ | $S$    | $\lambda_{\text{rel}}$<br>meV | $\omega$<br>$\text{cm}^{-1}$ | $S$    | $\lambda_{\text{rel}}$<br>meV |
|           | 208                          | 0.382  | 15.2                          | 207                          | 0.38   | 14.9                          |
|           | 253                          | 0.065  | 0.5                           | 250                          | 0.094  | 1.1                           |
|           | 294                          | 0.408  | 24.4                          | 286                          | 0.001  | 0                             |
|           | 298                          | -0.001 | 0                             | 296                          | -0.403 | 24                            |
|           | 350                          | 0.272  | 13                            | 351                          | 0.259  | 11.8                          |
|           | 394                          | 0.282  | 15.7                          | 388                          | 0.327  | 20.8                          |
|           | 494                          | 0.107  | 2.8                           | 487                          | 0      | 0                             |
|           | 495                          | 0      | 0                             | 495                          | 0.11   | 3                             |
|           | 624                          | 0.349  | 37.9                          | 620                          | 0.346  | 37.1                          |
|           | 651                          | -0.111 | 4                             | 633                          | -0.002 | 0                             |
|           | 675                          | 0.002  | 0                             | 651                          | 0.114  | 4.2                           |
|           | 693                          | -0.066 | 1.5                           | 689                          | -0.065 | 1.5                           |
|           | 742                          | 0      | 0                             | 738                          | 0.139  | 7.1                           |
|           | 747                          | 0.147  | 8.1                           | 739                          | 0.007  | 0                             |
|           | 813                          | -0.1   | 4                             | 811                          | -0.118 | 5.7                           |
|           | 835                          | 0      | 0                             | 831                          | -0.116 | 5.6                           |
|           | 849                          | 0.098  | 4.1                           | 875                          | 0      | 0                             |
|           | 955                          | 0      | 0                             | 965                          | 0.258  | 32                            |
|           | 966                          | 0.261  | 32.8                          | 974                          | 0      | 0                             |
|           | 1053                         | 0.06   | 1.9                           | 1052                         | 0.047  | 1.2                           |
|           | 1091                         | -0.147 | 11.8                          | 1094                         | -0.159 | 13.8                          |
|           | 1158                         | -0.183 | 19.3                          | 1154                         | -0.187 | 20.3                          |
|           | 1237                         | -0.003 | 0                             | 1227                         | -0.047 | 1.3                           |
|           | 1239                         | -0.059 | 2.2                           | 1238                         | 0      | 0                             |
|           | 1264                         | 0      | 0                             | 1258                         | -0.103 | 6.6                           |
|           | 1271                         | -0.187 | 22.3                          | 1263                         | 0      | 0                             |
|           | 1279                         | 0.037  | 0.9                           | 1276                         | 0.107  | 7.3                           |
|           | 1311                         | 0      | 0                             | 1303                         | -0.045 | 1.3                           |
|           | 1319                         | 0.001  | 0                             | 1314                         | 0.203  | 27                            |
|           | 1332                         | 0.353  | 83.1                          | 1336                         | 0      | 0                             |
|           | 1341                         | 0      | 0                             | 1339                         | -0.21  | 29.4                          |
|           | 1350                         | 0.221  | 32.9                          | 1356                         | 0      | 0                             |
|           | 1382                         | 0.099  | 6.8                           | 1363                         | 0.323  | 70.9                          |
|           | 1407                         | 0.005  | 0                             | 1409                         | 0.213  | 32                            |
|           | 1431                         | 0      | 0                             | 1421                         | -0.206 | 30.3                          |
|           | 1440                         | -0.104 | 7.7                           | 1438                         | -0.349 | 87.3                          |
|           | 1445                         | 0.349  | 87.9                          | 1448                         | 0      | 0                             |
|           | 1461                         | 0      | 0                             | 1450                         | -0.14  | 14.1                          |
|           | 1493                         | 0.045  | 1.5                           | 1494                         | 0.001  | 0                             |
|           | 1513                         | 0.029  | 0.7                           | 1511                         | 0.079  | 4.7                           |
|           | 1516                         | -0.001 | 0                             | 1516                         | -0.045 | 1.6                           |
|           | 1521                         | -0.124 | 11.7                          | 1521                         | 0      | 0                             |
|           | 1530                         | 0.053  | 2.1                           | 1529                         | 0      | 0                             |
|           | 1588                         | 0.379  | 113.9                         | 1572                         | 0.248  | 48.4                          |
|           | 1681                         | 0.544  | 248.8                         | 1660                         | 0.517  | 222.2                         |
|           | 3117                         | -0.031 | 1.5                           | 3123                         | -0.016 | 0.4                           |
|           | 3123                         | 0.012  | 0.2                           | 3132                         | 0.035  | 1.9                           |



**Table S24.** Frequency,  $\omega$  ( $\text{cm}^{-1}$ ), Huang-Rhys factors,  $S$ , and relaxation energies,  $\lambda_{\text{rel}}$  (meV), for the totally symmetric vibrations of **1e** in its neutral and cationic state as computed at  $\omega$ -tuned  $\omega\text{B97X-D/cc-pVTZ}$  level of theory. Values are unscaled.

| <b>1e</b>                    |        |                               |                              |        |                               |  |
|------------------------------|--------|-------------------------------|------------------------------|--------|-------------------------------|--|
| Neutral                      |        |                               |                              | Cation |                               |  |
| $\omega$<br>$\text{cm}^{-1}$ | $S$    | $\lambda_{\text{rel}}$<br>meV | $\omega$<br>$\text{cm}^{-1}$ | $S$    | $\lambda_{\text{rel}}$<br>meV |  |
| 210                          | 0.227  | 5.4                           | 202                          | 0.203  | 4.2                           |  |
| 262                          | 0.182  | 4.3                           | 253                          | 0.214  | 5.8                           |  |
| 289                          | 0.242  | 8.4                           | 283                          | 0      | 0                             |  |
| 299                          | -0.004 | 0                             | 285                          | -0.189 | 5.1                           |  |
| 327                          | -0.53  | 45.8                          | 325                          | -0.002 | 0                             |  |
| 331                          | 0      | 0                             | 326                          | 0.525  | 45                            |  |
| 357                          | -0.065 | 0.8                           | 355                          | -0.149 | 3.9                           |  |
| 384                          | 0      | 0                             | 380                          | -0.243 | 11.2                          |  |
| 393                          | 0.196  | 7.6                           | 383                          | 0      | 0                             |  |
| 478                          | 0.085  | 1.7                           | 473                          | 0.07   | 1.2                           |  |
| 483                          | 0      | 0                             | 478                          | 0      | 0                             |  |
| 488                          | -0.061 | 0.9                           | 489                          | -0.067 | 1.1                           |  |
| 637                          | -0.277 | 24.4                          | 617                          | 0      | 0                             |  |
| 639                          | -0.166 | 8.8                           | 624                          | 0      | 0                             |  |
| 665                          | 0      | 0                             | 637                          | 0.331  | 34.9                          |  |
| 679                          | -0.264 | 23.6                          | 675                          | -0.258 | 22.5                          |  |
| 696                          | 0.074  | 1.9                           | 686                          | 0.058  | 1.2                           |  |
| 813                          | 0.12   | 5.9                           | 806                          | 0.001  | 0                             |  |
| 828                          | 0      | 0                             | 806                          | 0.121  | 5.9                           |  |
| 879                          | -0.057 | 1.4                           | 870                          | -0.022 | 0.2                           |  |
| 902                          | 0      | 0                             | 898                          | -0.226 | 22.9                          |  |
| 904                          | 0.221  | 22                            | 901                          | 0      | 0                             |  |
| 1051                         | 0.052  | 1.4                           | 1048                         | 0      | 0                             |  |
| 1056                         | 0      | 0                             | 1052                         | 0.07   | 2.6                           |  |
| 1063                         | -0.076 | 3.1                           | 1055                         | 0      | 0                             |  |
| 1120                         | -0.054 | 1.7                           | 1099                         | -0.107 | 6.2                           |  |
| 1168                         | 0      | 0                             | 1155                         | 0.196  | 22.2                          |  |
| 1168                         | 0.265  | 41.1                          | 1170                         | 0      | 0                             |  |
| 1208                         | 0      | 0                             | 1197                         | 0.193  | 22.3                          |  |
| 1214                         | 0.107  | 6.9                           | 1219                         | 0      | 0                             |  |
| 1224                         | 0      | 0                             | 1227                         | 0.046  | 1.3                           |  |
| 1273                         | -0.496 | 156.4                         | 1271                         | -0.4   | 101.8                         |  |
| 1303                         | -0.039 | 1                             | 1279                         | -0.259 | 42.9                          |  |
| 1311                         | -0.334 | 73.1                          | 1296                         | -0.169 | 18.4                          |  |
| 1322                         | -0.014 | 0.1                           | 1313                         | -0.319 | 66.9                          |  |
| 1349                         | -0.031 | 0.7                           | 1361                         | -0.133 | 12.1                          |  |
| 1379                         | 0.363  | 90.6                          | 1369                         | 0.095  | 6.1                           |  |
| 1389                         | 0      | 0                             | 1407                         | 0.347  | 84.6                          |  |
| 1406                         | -0.011 | 0.1                           | 1414                         | -0.105 | 7.8                           |  |
| 1439                         | 0.062  | 2.8                           | 1441                         | 0      | 0                             |  |
| 1452                         | 0      | 0                             | 1447                         | 0.077  | 4.3                           |  |
| 1476                         | 0.112  | 9.2                           | 1450                         | 0.009  | 0.1                           |  |
| 1485                         | 0.038  | 1.1                           | 1481                         | 0.145  | 15.6                          |  |
| 1503                         | 0.046  | 1.6                           | 1495                         | 0.015  | 0.2                           |  |
| 1528                         | -0.016 | 0.2                           | 1528                         | -0.05  | 1.9                           |  |
| 1540                         | 0      | 0                             | 1530                         | 0.113  | 9.8                           |  |
| 1549                         | 0.178  | 24.5                          | 1552                         | 0      | 0                             |  |
| 1637                         | -0.161 | 21.3                          | 1556                         | -0.056 | 2.5                           |  |
| 1648                         | 0.192  | 30.5                          | 1603                         | 0      | 0                             |  |
| 1672                         | 0      | 0                             | 1614                         | -0.091 | 6.6                           |  |
| 1676                         | 0.104  | 9                             | 1662                         | 0.364  | 109.9                         |  |
| 1679                         | 0.439  | 162.1                         | 1670                         | 0.001  | 0                             |  |
| 1679                         | 0      | 0                             | 1672                         | 0.295  | 72.5                          |  |
| 3116                         | -0.033 | 1.7                           | 3125                         | -0.001 | 0                             |  |
| 3123                         | 0.001  | 0                             |                              | 0.034  | 1.8                           |  |

**Table S25.** Frequency,  $\omega$  ( $\text{cm}^{-1}$ ), Huang-Rhys factors,  $S$ , and relaxation energies,  $\lambda_{\text{rel}}$  (meV), for the totally symmetric vibrations of **PY** in its neutral and cationic state as computed at  $\omega$ -tuned  $\omega\text{B97X-D/cc-pVTZ}$  level of theory. Values are unscaled.

| PY      |                              |        |                               |                              |        |                               |
|---------|------------------------------|--------|-------------------------------|------------------------------|--------|-------------------------------|
| Neutral |                              |        | Cation                        |                              |        |                               |
|         | $\omega$<br>$\text{cm}^{-1}$ | $S$    | $\lambda_{\text{rel}}$<br>meV | $\omega$<br>$\text{cm}^{-1}$ | $S$    | $\lambda_{\text{rel}}$<br>meV |
|         | 422                          | -0.432 | 39.3                          | 424                          | -0.45  | 43                            |
|         | 615                          | 0.308  | 29.2                          | 624                          | 0.29   | 26.2                          |
|         | 835                          | -0.196 | 16.1                          | 837                          | -0.193 | 15.6                          |
|         | 1125                         | 0.088  | 4.4                           | 1129                         | 0.097  | 5.3                           |
|         | 1201                         | -0.182 | 20                            | 1200                         | -0.276 | 45.9                          |
|         | 1294                         | -0.757 | 370.4                         | 1271                         | -0.001 | 0                             |
|         | 1295                         | 0.131  | 11.2                          | 1291                         | 0      | 0                             |
|         | 1297                         | 0      | 0                             | 1301                         | 0.683  | 303.5                         |
|         | 1390                         | -0.109 | 8.3                           | 1373                         | -0.001 | 0                             |
|         | 1415                         | 0      | 0                             | 1412                         | 0.189  | 25.3                          |
|         | 1488                         | 0.453  | 152.9                         | 1475                         | 0.643  | 305                           |
|         | 1763                         | 0.831  | 608.4                         | 1742                         | 0.72   | 451.6                         |
|         | 3248                         | 0.034  | 1.9                           | 3268                         | 0.03   | 1.5                           |

**Table S26.** Frequency,  $\omega$  ( $\text{cm}^{-1}$ ), Huang-Rhys factors,  $S$ , and relaxation energies,  $\lambda_{\text{rel}}$  (meV), for the totally symmetric vibrations of **2** in its neutral and cationic state as computed at  $\omega$ -tuned  $\omega\text{B97X-D/cc-pVTZ}$  level of theory. Values are unscaled.

| 2       |                              |        |                               |                              |        |                               |
|---------|------------------------------|--------|-------------------------------|------------------------------|--------|-------------------------------|
| Neutral |                              |        | Cation                        |                              |        |                               |
|         | $\omega$<br>$\text{cm}^{-1}$ | $S$    | $\lambda_{\text{rel}}$<br>meV | $\omega$<br>$\text{cm}^{-1}$ | $S$    | $\lambda_{\text{rel}}$<br>meV |
|         | 216                          | -0.336 | 12.2                          | 214                          | -0.342 | 12.5                          |
|         | 320                          | -0.092 | 1.3                           | 318                          | -0.091 | 1.3                           |
|         | 468                          | -0.389 | 35.4                          | 471                          | -0.378 | 33.5                          |
|         | 487                          | -0.118 | 3.4                           | 482                          | -0.16  | 6.2                           |
|         | 579                          | -0.163 | 7.7                           | 580                          | 0      | 0                             |
|         | 593                          | 0      | 0                             | 587                          | -0.173 | 8.8                           |
|         | 665                          | 0.229  | 17.5                          | 635                          | 0      | 0                             |
|         | 693                          | 0      | 0                             | 665                          | -0.211 | 14.8                          |
|         | 822                          | 0.063  | 1.6                           | 820                          | 0.059  | 1.5                           |
|         | 929                          | 0      | 0                             | 940                          | -0.201 | 19                            |
|         | 939                          | 0.18   | 15.3                          | 940                          | 0      | 0                             |
|         | 943                          | 0      | 0                             | 955                          | -0.068 | 2.2                           |
|         | 952                          | -0.074 | 2.6                           | 964                          | 0      | 0                             |
|         | 1051                         | -0.039 | 0.8                           | 1050                         | -0.045 | 1.1                           |
|         | 1145                         | -0.167 | 16                            | 1143                         | -0.195 | 21.7                          |
|         | 1147                         | 0.061  | 2.1                           | 1172                         | 0      | 0                             |
|         | 1173                         | 0      | 0                             | 1180                         | 0.015  | 0.1                           |
|         | 1182                         | 0      | 0                             | 1183                         | -0.147 | 12.8                          |
|         | 1187                         | 0.07   | 2.9                           | 1201                         | 0      | 0                             |
|         | 1238                         | 0      | 0                             | 1231                         | -0.041 | 1.1                           |
|         | 1240                         | 0.089  | 4.9                           | 1238                         | 0      | 0                             |
|         | 1261                         | 0.512  | 165.6                         | 1258                         | 0      | 0                             |
|         | 1264                         | 0      | 0                             | 1261                         | 0.297  | 55.6                          |
|         | 1296                         | -0.09  | 5.3                           | 1266                         | -0.369 | 86.2                          |
|         | 1329                         | -0.442 | 130.1                         | 1319                         | -0.394 | 102.5                         |
|         | 1378                         | 0.153  | 16.1                          | 1382                         | 0      | 0                             |
|         | 1401                         | -0.013 | 0.1                           | 1392                         | -0.114 | 9                             |
|         | 1407                         | 0      | 0                             | 1395                         | 0.057  | 2.2                           |
|         | 1420                         | 0.04   | 1.1                           | 1417                         | 0      | 0                             |
|         | 1439                         | 0.067  | 3.2                           | 1447                         | 0      | 0                             |
|         | 1440                         | 0      | 0                             | 1448                         | -0.128 | 12                            |
|         | 1470                         | -0.306 | 68.8                          | 1457                         | -0.498 | 180.8                         |
|         | 1509                         | -0.044 | 1.5                           | 1511                         | -0.03  | 0.7                           |
|         | 1529                         | -0.039 | 1.2                           | 1529                         | -0.044 | 1.4                           |
|         | 1635                         | 0.08   | 5.2                           | 1590                         | 0      | 0                             |
|         | 1655                         | 0.078  | 5                             | 1600                         | 0.044  | 1.5                           |
|         | 1674                         | 0      | 0                             | 1624                         | -0.038 | 1.1                           |
|         | 1709                         | -0.668 | 381.7                         | 1694                         | -0.589 | 294                           |
|         | 3116                         | 0.037  | 2.1                           | 3127                         | 0      | 0                             |
|         | 3124                         | 0.018  | 0.5                           | 3132                         | 0.04   | 2.5                           |
|         | 3197                         | 0.027  | 1.1                           | 3216                         | 0.019  | 0.6                           |

**Table S27.** Frequency,  $\omega$  ( $\text{cm}^{-1}$ ), Huang-Rhys factors,  $S$ , and relaxation energies,  $\lambda_{\text{rel}}$  (meV), for the totally symmetric vibrations of **TC** in its neutral and cationic state as computed at  $\omega$ -tuned  $\omega\text{B97X-D/cc-pVTZ}$  level of theory. Values are unscaled.

| TC      |                              |        |                               |                              |        |                               |
|---------|------------------------------|--------|-------------------------------|------------------------------|--------|-------------------------------|
| Neutral |                              |        | Cation                        |                              |        |                               |
|         | $\omega$<br>$\text{cm}^{-1}$ | $S$    | $\lambda_{\text{rel}}$<br>meV | $\omega$<br>$\text{cm}^{-1}$ | $S$    | $\lambda_{\text{rel}}$<br>meV |
|         | 321                          | 0.182  | 5.3                           | 319                          | 0.173  | 4.8                           |
|         | 776                          | -0.065 | 1.7                           | 781                          | 0      | 0                             |
|         | 869                          | 0      | 0                             | 892                          | 0.067  | 2                             |
|         | 883                          | -0.1   | 4.4                           | 899                          | 0      | 0                             |
|         | 1031                         | 0.158  | 12.9                          | 1058                         | 0.11   | 6.4                           |
|         | 1197                         | 0.214  | 27.5                          | 1207                         | 0.001  | 0                             |
|         | 1201                         | 0      | 0                             | 1210                         | -0.281 | 47.9                          |
|         | 1235                         | -0.394 | 96.1                          | 1253                         | -0.392 | 96.3                          |
|         | 1429                         | 0      | 0                             | 1424                         | -0.339 | 81.7                          |
|         | 1434                         | 0.519  | 192.8                         | 1431                         | 0      | 0                             |
|         | 1453                         | -0.25  | 45.5                          | 1446                         | 0      | 0                             |
|         | 1467                         | 0      | 0                             | 1454                         | 0.553  | 222.7                         |
|         | 1496                         | 0.195  | 28.4                          | 1498                         | 0.01   | 0.1                           |
|         | 1584                         | 0.193  | 29.5                          | 1566                         | 0.003  | 0                             |
|         | 1613                         | 0.532  | 228.5                         | 1568                         | 0.35   | 95.9                          |
|         | 1685                         | 0      | 0                             | 1618                         | -0.383 | 118.6                         |
|         | 3215                         | -0.027 | 1.1                           | 3231                         | -0.021 | 0.7                           |

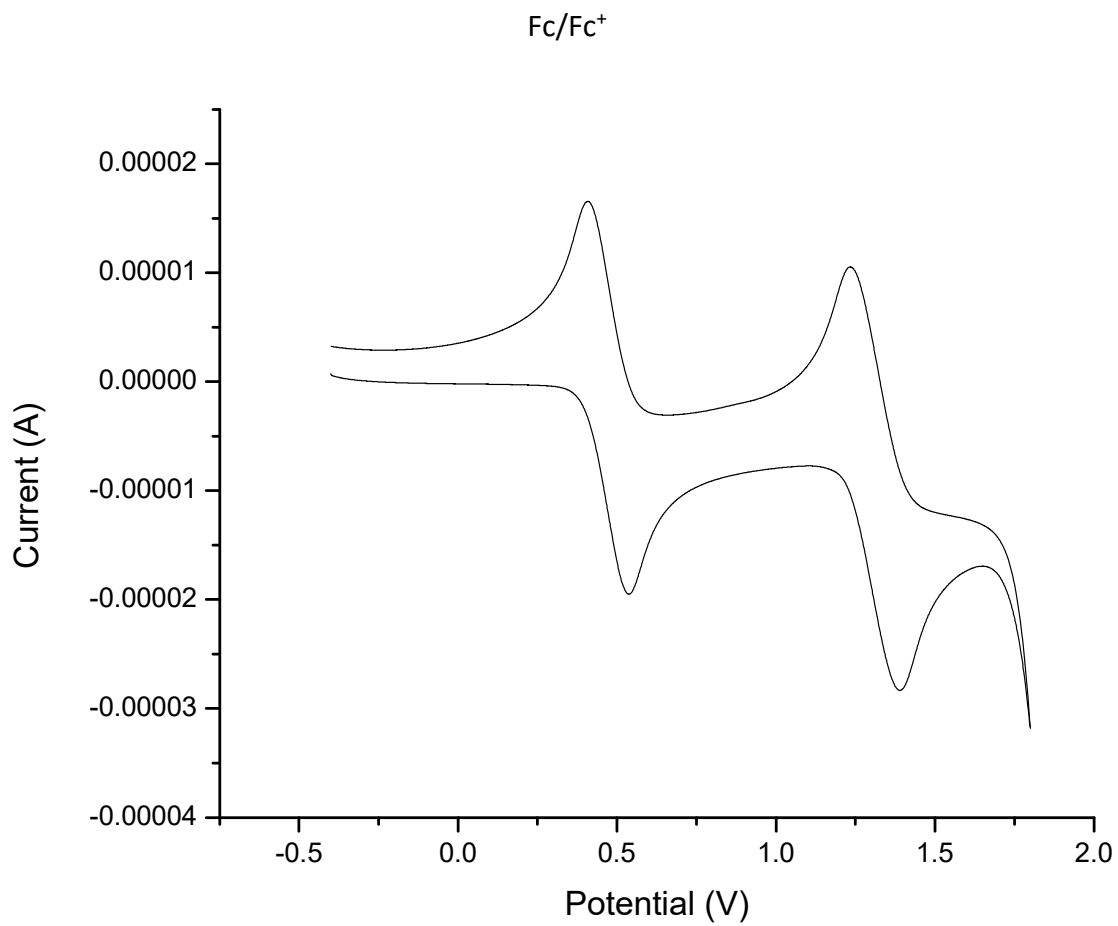

**Figure S1.** Cyclic voltammogram of **2** in tetra-<sup>n</sup>butylammonium hexafluorophosphate (0.1 M) in dichloromethane containing ferrocene (Fc/Fc<sup>+</sup>).

#### References

1. E. L. Graef and J. B. L. Martins, *J. Mol. Model.*, 2019, **25**, 183.
2. C. S. Frampton, K. S. Knight, N. Shankland and K. Shankland, *J. Mol. Struct.*, 2000, **520**, 29-32.
3. J. D. Chai and M. Head-Gordon, *Phys. Chem. Chem. Phys.*, 2008, **10**, 6615-6620.
4. R. A. Kendall, T. H. Dunning and R. J. Harrison, *J. Chem. Phys.*, 1992, **96**, 6796-6806.
